# Supplementary material for: Three-tiered EGFr domain risk stratification for individualized NOTCH3-small vessel disease prediction
Source: PubMed Central journal article supplement — Brain. 2022 Dec 20;146(7):2913–27. doi: 10.1093/brain/awac486 (PMC10316769; doi:10.1093/brain/awac486), 2022-12-20
Supplement: awac486_supplementary_data.pdf [file awac486_supplementary_data.pdf]

---

## **SUPPLEMENTAL MATERIAL**

### **3-tiered EGFr domain risk stratification for individualized NOTCH3-small vessel disease prediction**

Remco J. Hack,<sup>1</sup> Gido Gravesteijn,<sup>1,†</sup> Minne N. Cerfontaine,<sup>1,†</sup> Mark A. Santcroos,<sup>2</sup> Laura Gatti,<sup>3</sup>  
Anna Kopczak,<sup>4</sup> Anna Bersano,<sup>5</sup> Marco Duering,<sup>4,6</sup> Julie W. Rutten<sup>1,‡</sup> and Saskia A.J. Lesnik  
Oberstein<sup>1,‡</sup>

**Author affiliations:**

1 Department of Clinical Genetics, Leiden University Medical Center, 2333 ZA Leiden, the Netherlands.

2 Department of Human Genetics, Leiden University Medical Center, 2333 ZA Leiden, the Netherlands.

3. Laboratory of Neurobiology, Fondazione IRCSS Istituto Neurologico Carlo Besta, Milan, Italy.

4 Institute for Stroke and Dementia Research, LMU University Hospital Munich, 81377 Munich, Germany.

5 Cerebrovascular Unit, Fondazione IRCCS Istituto Neurologico Carlo Besta, 20133 Milan, Italy.

6 Medical Image Analysis Center (MIAC) and Department of Biomedical Engineering, University of Basel, 4051  
Basel, Switzerland

---

Supplementary Figure 1

**A**

|           | Disease | No disease |
|-----------|---------|------------|
| Exposed   | A       | B          |
| Unexposed | C       | D          |

$$OR = \frac{\text{odds of exposure (disease)}}{\text{odds of exposure (no disease)}} = \frac{A / C}{B / D}$$

**B**

|                | CADASIL | Population |
|----------------|---------|------------|
| In EGFr X      | 20      | 1          |
| Outside EGFr X | 80      | 99         |

$$NVFOR = \frac{20 / 80}{1 / 99} = 25$$

**C**

|                | CADASIL | Population |
|----------------|---------|------------|
| In EGFr Y      | 1       | 20         |
| Outside EGFr Y | 99      | 80         |

$$NVFOR = \frac{1 / 99}{20 / 80} = 0.04$$

---

**Supplementary Figure 1. Hypothetical examples of the calculation of *NOTCH3*<sup>cys</sup> Variant Frequency**

**Odds Ratio. (A)** In case-control studies the odds ratio is calculated by dividing “*the odds of exposure in the disease group*” by “*the odds of exposure in the group without disease*”. **(B-C)** The calculation of the *NOTCH3*<sup>cys</sup> Variant Frequency Odds Ratio (NVFOR) is performed in the same manner: “*the odds that a NOTCH3<sup>cys</sup> variant is located in a certain EGFr domain in CADASIL patients*” is divided by “*the odds that a NOTCH3<sup>cys</sup> variant is located in the same EGFr domain in individuals with a NOTCH3<sup>cys</sup> variant from population databases*”. In our examples, we have calculated the NVFOR for hypothetical EGFr domains “X” and “Y”. Our hypothetical CADASIL cohort and population cohort both include 100 individuals with a *NOTCH3*<sup>cys</sup> variant. **(B)** 20% of the CADASIL patients have a *NOTCH3*<sup>cys</sup> variant located in EGFr domain X, whereas only 1% of the individuals from population databases have a *NOTCH3*<sup>cys</sup> variant located in EGFr domain X, which corresponds to a high NVFOR of 25. **(C)** Only 1% of CADASIL patients have a *NOTCH3*<sup>cys</sup> variant located in EGFr domain Y, whereas 20% of the individuals from population databases have a *NOTCH3*<sup>cys</sup> variant located in EGFr domain Y, which corresponds to a low NVFOR of 0.04.

Supplementary Figure 2

A

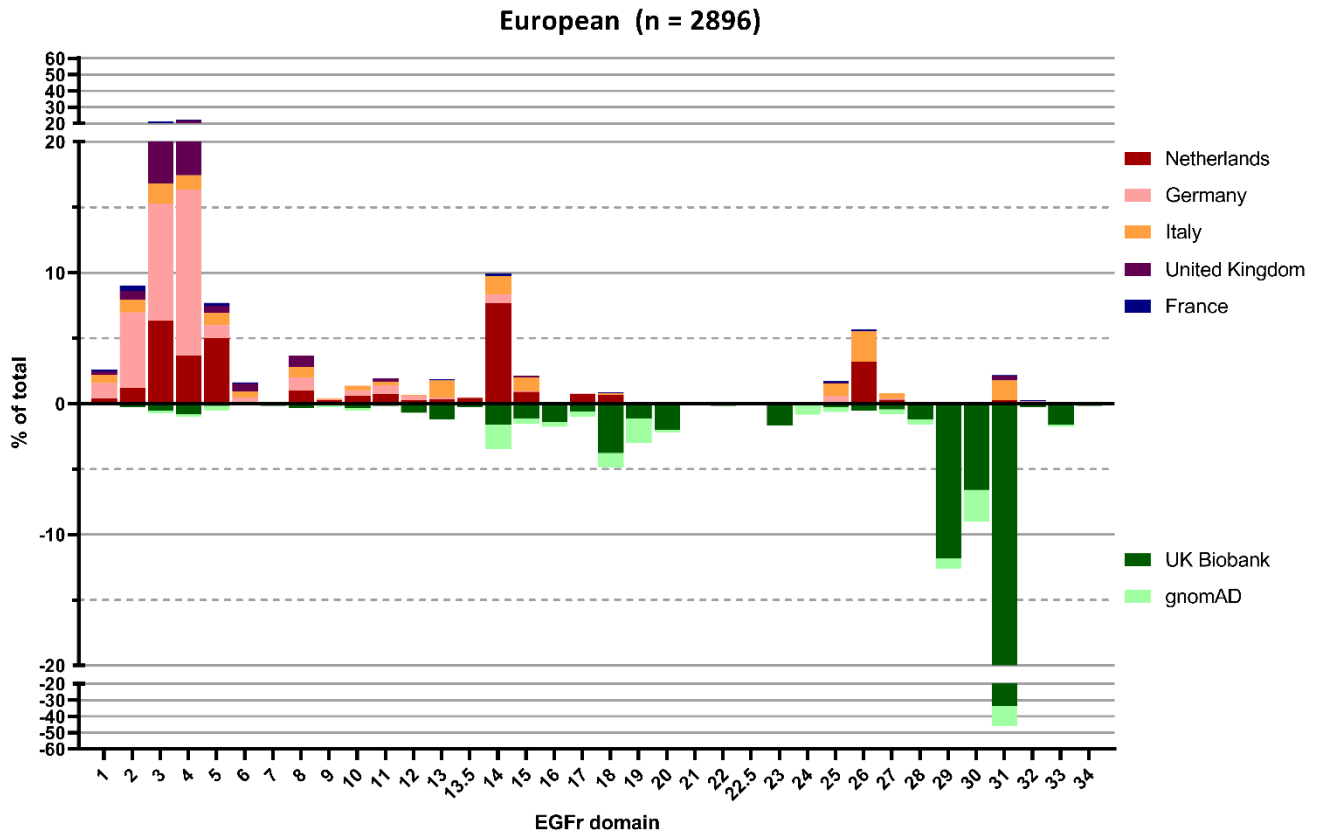

B

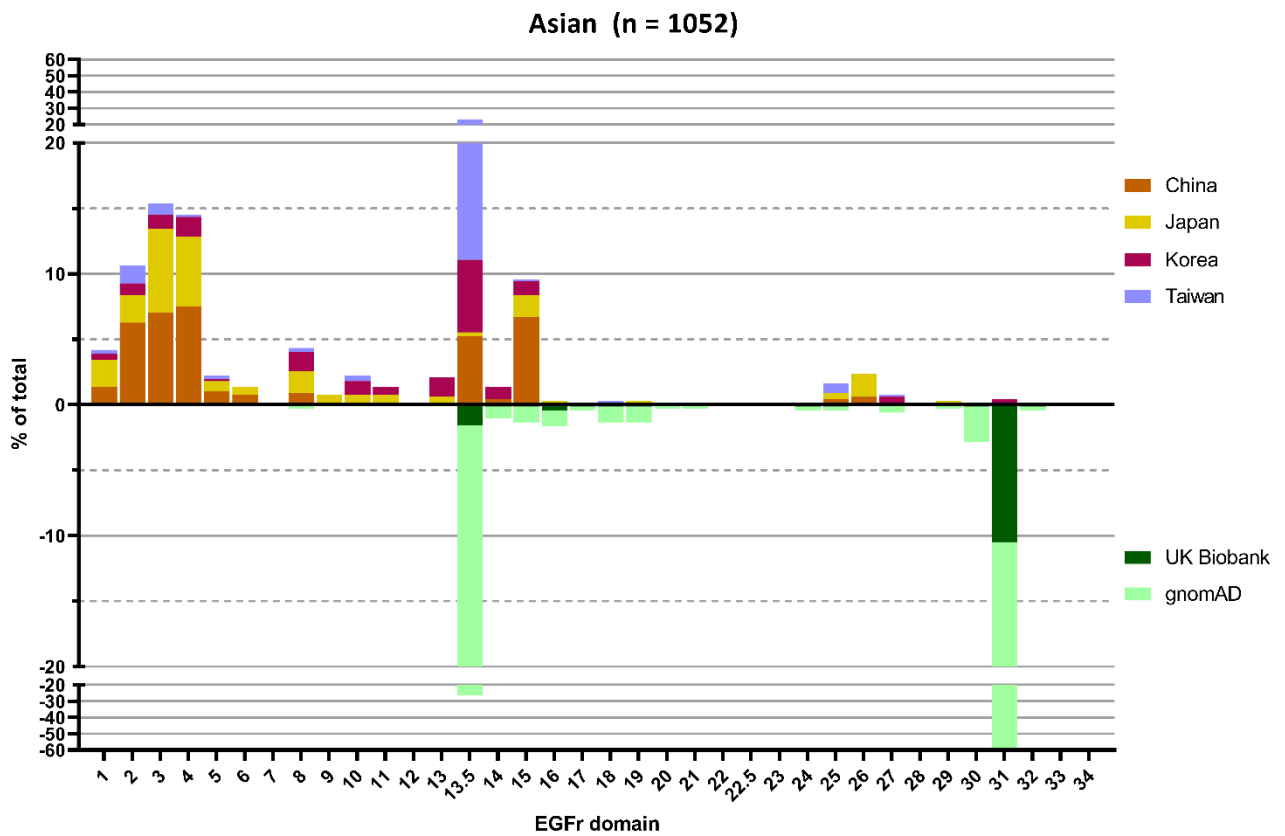

---

**Supplementary Figure 2. The distribution of *NOTCH3*<sup>cys</sup> variants in CADASIL cohorts and in population database in individuals with a *NOTCH3*<sup>cys</sup> variant from European and Asian descent.**

Distribution of *NOTCH3*<sup>cys</sup> variants in CADASIL cohorts (top) and population databases (bottom) along the 34 EGFr domains in individuals from European (A) and Asian (B) descent. The European dataset consisted of 2896 individuals with a *NOTCH3*<sup>cys</sup> variant, of which 1905 were CADASIL patients and 991 were community-dwelling individuals. The Asian dataset consisted of 1052 individuals with a *NOTCH3*<sup>cys</sup> variant, of which 669 were CADASIL patients and 383 were community-dwelling individuals. The p.Arg544Cys located in EGFr domain 13,5 had a high frequency in Asian CADASIL patients (22.9 %) and Asian community-dwelling individuals (24.3 %), whereas this *NOTCH3*<sup>cys</sup> variant was only rarely identified in European CADASIL patient (0.7 %) and community-dwelling individuals (0.3 %). In European CADASIL patients the p.Arg578Cys located in EGFr domain 14 had a relatively high frequency compared to Asian CADASIL patients (10.2 % versus 0.3 %), due to a high frequency of this variant in Dutch CADASIL patients (19.1 % of Dutch CADASIL patients). The p.Arg1231Cys variant had a higher frequency in Asian community-dwelling individuals (62.4 %) compared to European community-dwelling individuals (19.6 %). As DiscovEHR and BRAVO had no data regarding the ethnicity available, these datasets were excluded.

Supplementary Figure 3

A

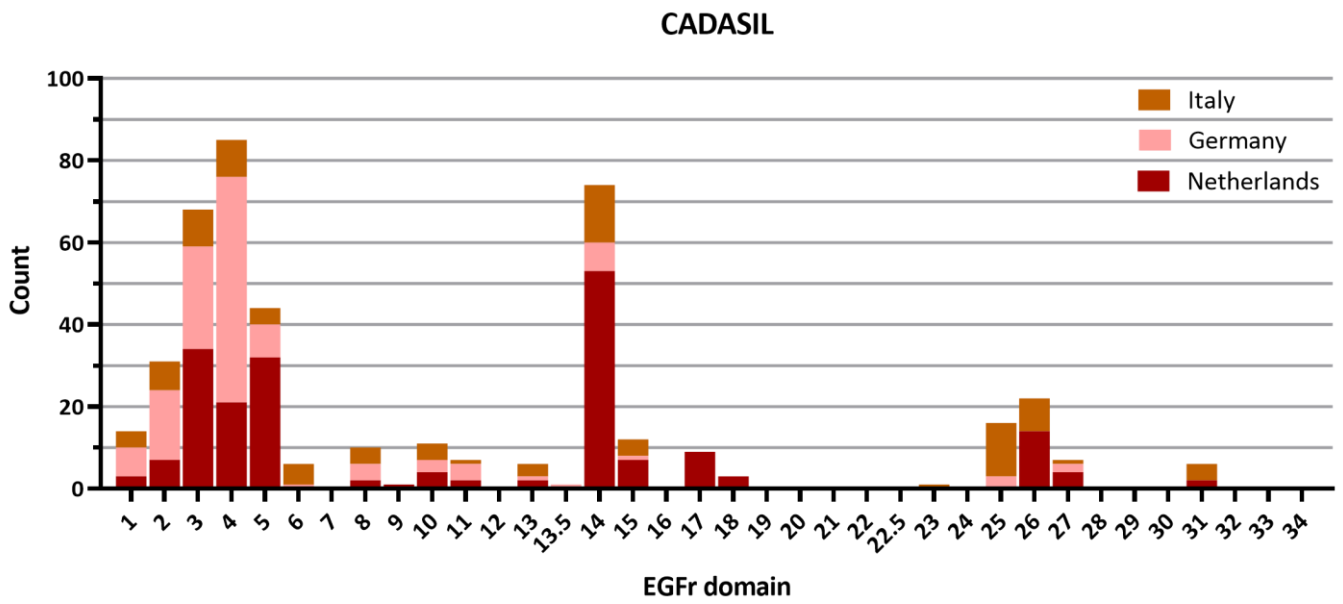

B

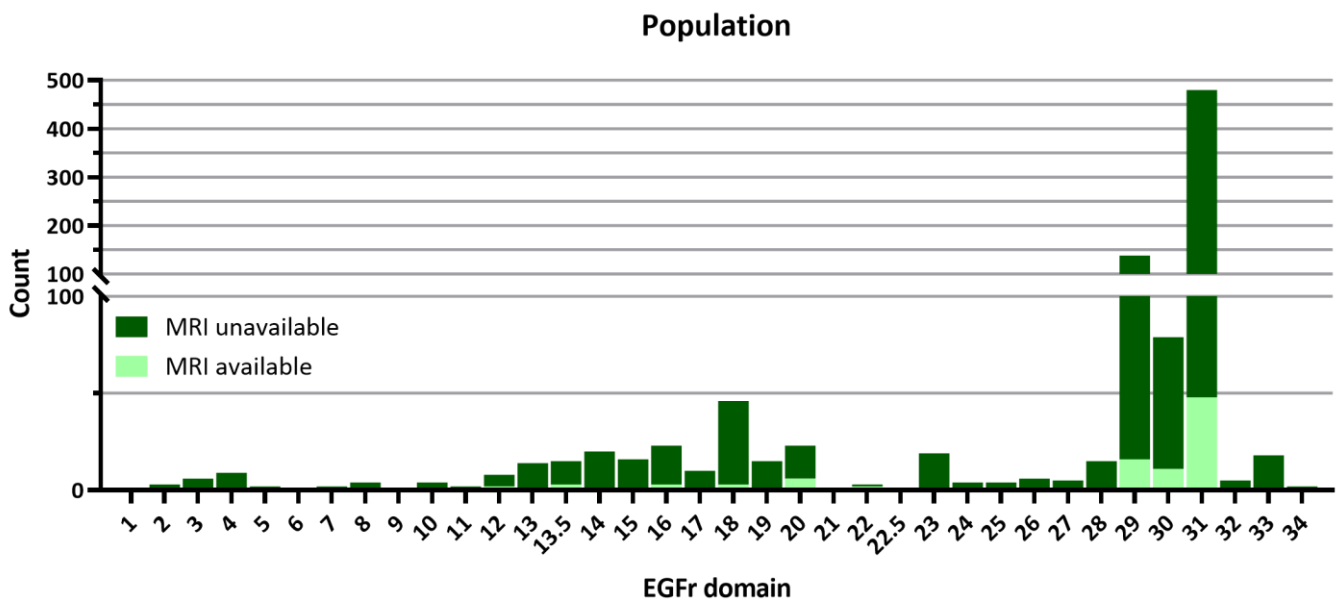

---

**Supplementary Figure 3. Number of *NOTCH3*<sup>CVS</sup> variants per EGFr domain for genotype-phenotype analysis in the CADASIL and population datasets. *NOTCH3*<sup>CVS</sup> variant distribution in the CADASIL (A) and population (B) datasets.**

Supplementary Figure 4

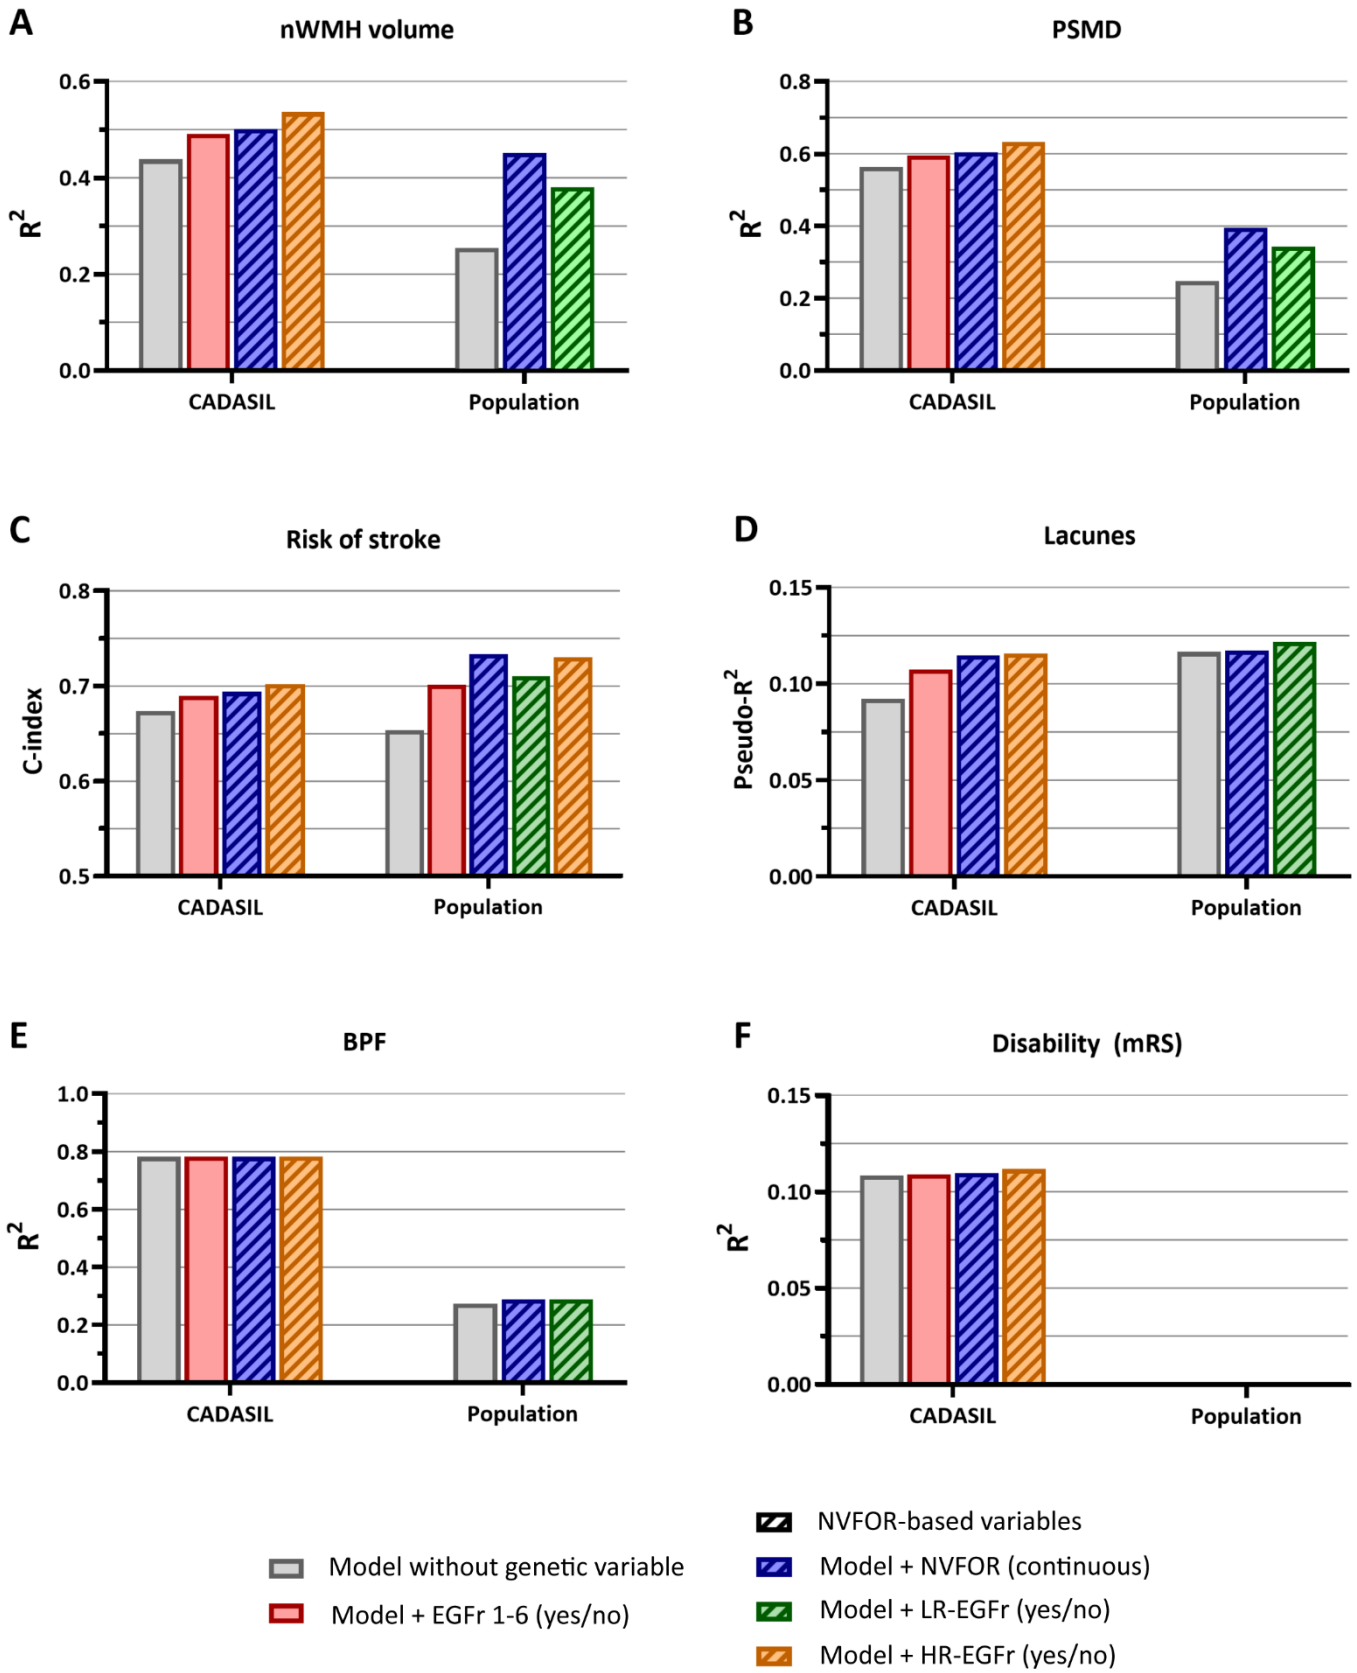



---

**Supplementary Figure 4. Using NVFOR increases the explained variance of SVD imaging markers and clinical outcomes in the CADASIL and population datasets.** Six grouped bar charts (A-F) showing the change in explained variance expressed as  $R^2$ , McFadden's pseudo  $R^2$  and c-index of SVD imaging markers and clinical outcomes by adding the following genetic variables to multivariable models: "EGFr 1-6 (yes/no)", "NVFOR as a continuous variable", "LR-EGFr (yes/no)" and "HR-EGFr (yes/no)". All models included the following independent variables: age, sex and cardiovascular risk factors. "LR-EGFr (yes/no)" was not added as a variable to the models in the CADASIL dataset, because only 10 CADASIL patients harbored an LR-EGFr variant. As none of the individuals with a brain MRI in the population dataset harbored a *NOTCH3*<sup>cys</sup> EGFr 1-6 variant and only two individuals harbored an HR-EGFr variant, the variables "EGFr 1-6 (yes/no)" and "HR-EGFr (yes/no)" were not added to the models with SVD imaging markers as outcomes in the population dataset. (A-C) In the CADASIL dataset, using NVFOR- increased the explained variance of nWMHv, PSMD and age at first stroke compared to using "EGFr 1-6 (yes/no)". In the population dataset, NVFOR increased the c-index of age at first stroke compared to using "EGFr 1-6 (yes/no)", and increased the explained variance of nWMHv and PSMD. (D) In the CADASIL dataset, using NVFOR increased the explained variance of lacune volume compared to using "EGFr 1-6 (yes/no)", but using NVFOR in the population dataset did not improve the explained variance of the presence of lacunes. (E-F) In the CADASIL and population dataset, using NVFOR did not increase the explained variance for BPF or disability. There was no data available regarding disability in the population dataset.

Supplementary Figure 5

● LR-EGFr ● MR-EGFr

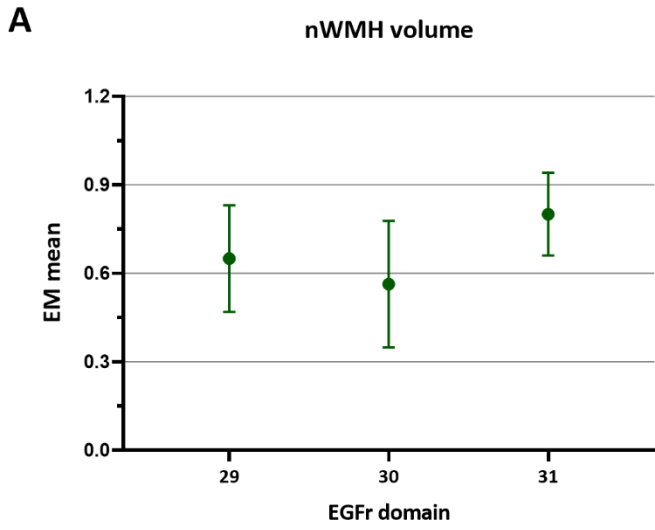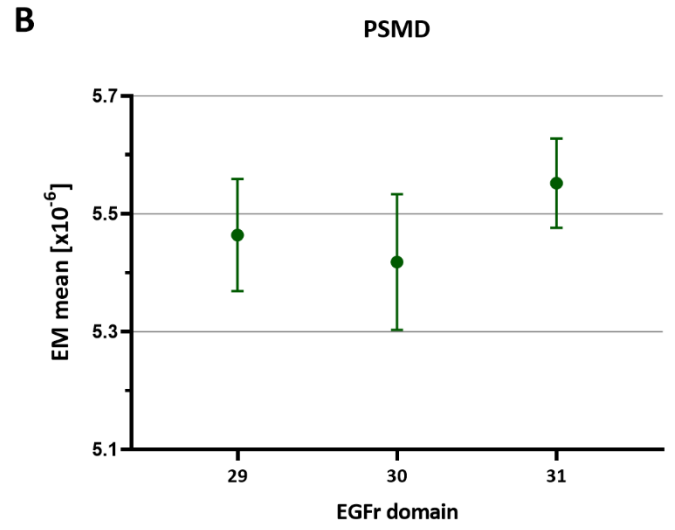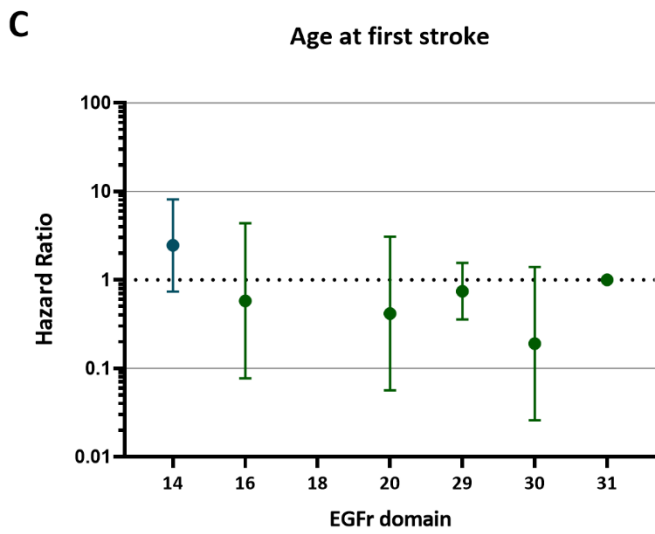

---

**Supplementary Figure 5. NOTCH3-SVD severity associated with EGFr domains most frequently harboring *NOTCH3*<sup>cys</sup> variants in the population dataset.** Three interval plots showing the estimated marginal means and hazard ratios of nWMHv, PSMD and risk of stroke for the EGFr domains most frequently harboring *NOTCH3*<sup>cys</sup> variants in the population dataset. Only EGFr domains which had high *NOTCH3*<sup>cys</sup> variant counts ( $\geq 10$  individuals for nWMHv and PSMD, and  $\geq 20$  individuals for risk of stroke) were included in the analyses. Error bars indicate 95% confidence intervals of the group means. **(A-C)** Of all frequent LR-EGFr domains, EGFr domain 30 was associated with the lowest burden of nWMHv, PSMD and risk of stroke. EGFr domain 14 is the only MR-EGFr domain which has high variant counts in both CADASIL cohorts and in the population, and is associated with a higher risk of stroke than LR-EGFr domains frequently harboring *NOTCH3*<sup>cys</sup> variants in the population. As none of the individuals with a variant in EGFr domain 18 had experienced a stroke, the stroke risk for this domain could not be calculated.

Further details including statistically significant differences in nWMHv, PSMD and risk of stroke between EGFr domains are shown in **Supplementary Table 5 & 6**.

Supplementary Figure 6

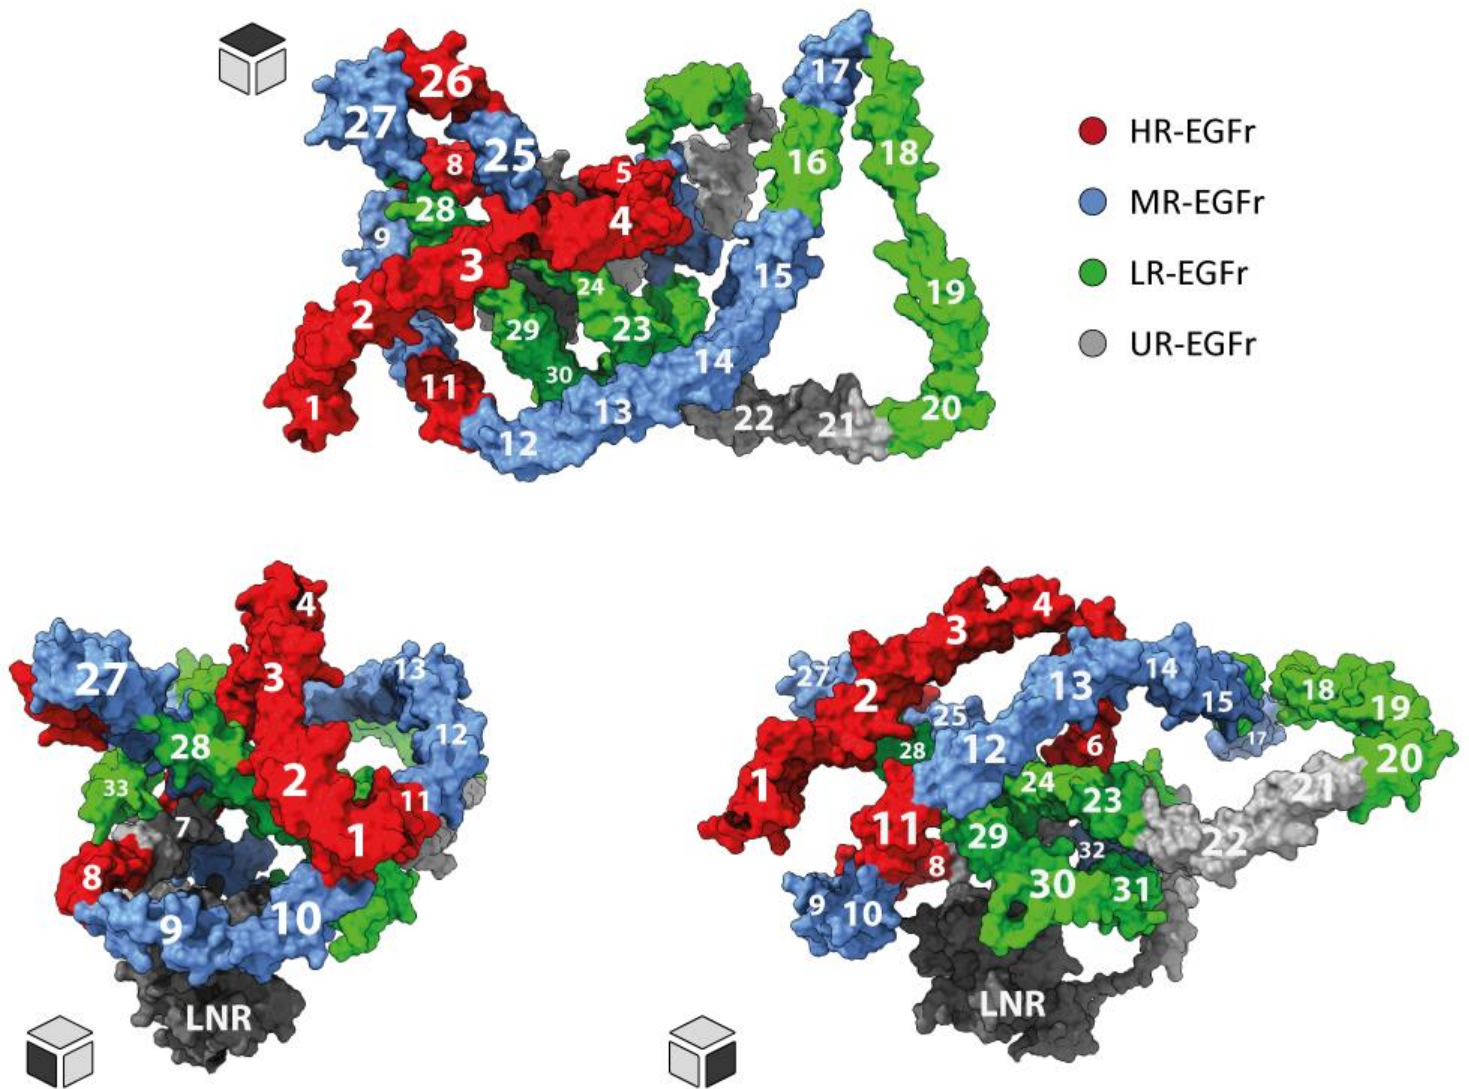

---

**Supplementary Figure 6. AlphaFold prediction of the NOTCH3 protein 3D structure.** The predicted 3D structure of the extracellular domain of the NOTCH3 protein by AlphaFold is shown from three different angles. The predicted model with the highest confidence score is shown (pLDDT=68.2). HR-EGFr and MR-EGFr domains are located at the surface of one side of the NOTCH3 protein model, whereas LR-EGFr domains are located more internally or in a loop directed away from the HR-EGFr and MR-EGFr domains. The newly identified HR-EGFr domain 26 is predicted to be located in a loop at the surface, in close proximity to HR-EGFr domains 1-6. Taken together, this model suggests HR-EGFr domains may be located more externally at the surface at one side of the protein, but the model does not provide clear clues as to potential tertiary structural differences between HR-, MR- and LR-EGFr domains.

---

**Supplementary Table 1. Acquisition parameters of brain MRIs**

| Sequence |                              | DiViNAS     | Munich<br>Signa scanner | Munich<br>Verio scanner | Munich<br>Skyra scanner     | UK Biobank                  |
|----------|------------------------------|-------------|-------------------------|-------------------------|-----------------------------|-----------------------------|
| T1       | TR [ms]                      | 3.5         | 22                      | 2500                    | 2500                        | 2000                        |
|          | TE [ms]                      | 7.9         | 6                       | 4.37                    | 4.37                        | 2.01                        |
|          | Slice [mm]                   | 1.10        | 1.2                     | 1                       | 1                           | 1                           |
|          | In-plane [mm]                | 1.04 x 1.04 | 0.90 x 0.90             | 1 x 1                   | 1 x 1                       | 1 x 1                       |
| T2       | TR [ms]                      | 3000        | 3300                    | 6500                    | NA                          | NA                          |
|          | TE [ms]                      | 80          | 95                      | 117                     | NA                          | NA                          |
|          | Slice [mm]                   | 5           | 5                       | 3.3                     | NA                          | NA                          |
|          | In-plane [mm]                | 0.4 x 0.4   | 0.94 x 0.94             | 1 x 1                   | NA                          | NA                          |
| FLAIR    | TR [ms]                      | 4800        | 8402                    | 5000                    | 5000                        | 5000                        |
|          | TE [ms]                      | 250         | 151                     | 395                     | 398                         | 395                         |
|          | TI [ms]                      | 1650        | 2002                    | 1800                    | 1800                        | 1800                        |
|          | Slice [mm]                   | 0.56        | 5                       | 1                       | 1                           | 1.05                        |
|          | In-plane [mm]                | 0.74 x 0.74 | 0.94 x 0.94             | 1 x 1                   | 1 x 1                       | 1 x 1                       |
| DWI      | TR [ms]                      | 6250        | 8300                    | 12700                   | 3800                        | 3600                        |
|          | TE [ms]                      | 72          | 96                      | 81                      | 104.8                       | 92                          |
|          | Slice [mm]                   | 2.1         | 5                       | 2                       | 2                           | 2                           |
|          | In-plane [mm]                | 2 x 2       | 0.94 x 0.94             | 2 x 2                   | 2 x 2                       | 2 x 2                       |
|          | b-value [s/mm <sup>2</sup> ] | 1000        | 1000                    | 1000                    | 1000; 2000                  | 1000; 2000                  |
|          | Directions                   | 30          | 41                      | 30                      | 30 (b=1000);<br>60 (b=2000) | 50 (b=1000);<br>50 (b=2000) |

Abbreviations: DWI = diffusion weighted imaging; FLAIR = fluid-attenuated inversion recovery; TE = echo time; TI = inversion time; TR = repetition time.

**Supplementary Table 2. List of codes used in UK Biobank for data retrieval.**

|                               | <b>Code type</b>                          | <b>Code</b>         | <b>Date of last linkage</b> |
|-------------------------------|-------------------------------------------|---------------------|-----------------------------|
| <b>Stroke</b>                 | <b>ICD-9</b>                              | 431, 433, 434, 436  | January 2021                |
|                               | <b>ICD-10</b>                             | I61, I63, I64       | June 2021                   |
|                               | <b>Illness code</b>                       | 1081, 1583          | July 2021                   |
|                               | <b>UK biobank algorithmically defined</b> | 42006, 42008, 42010 | March 2019                  |
| <b>Hypertension</b>           | <b>ICD-9</b>                              | 401                 | January 2021                |
|                               | <b>ICD-10</b>                             | I10, I15            | June 2021                   |
|                               | <b>Illness code</b>                       | 1065, 1072          | July 2021                   |
| <b>Diabetes type I and II</b> | <b>ICD-9</b>                              | 250                 | January 2021                |
|                               | <b>ICD-10</b>                             | E10, E11            | June 2021                   |
|                               | <b>Illness code</b>                       | 1220, 1222, 1223    | July 2021                   |
| <b>Hypercholesterolemia</b>   | <b>ICD-9</b>                              | 272                 | January 2021                |
|                               | <b>ICD-10</b>                             | E78                 | June 2021                   |
|                               | <b>Illness code</b>                       | 1473                | July 2021                   |
| <b>Smoking</b>                | <b>UK Biobank variable</b>                | 20116, 20160        | July 2021                   |

**Supplementary Table 3. *NOTCH3*<sup>CYS</sup> variants of CADASIL patients used for analysis of NOTCH3**

aggregation in the skin vasculature.

| EGFr risk category | #  | Age | Sex | Nucleotide alteration | Protein alteration | Exon | EGFr domain |
|--------------------|----|-----|-----|-----------------------|--------------------|------|-------------|
| HR-EGFr 1-6        | 1  | 54  | M   | c.421C>T              | p.Arg141Cys        | 4    | 3           |
|                    | 2  | 58  | M   | c.431G>T              | p.Cys144Phe        | 4    | 3           |
|                    | 3  | 58  | F   | c.457C>T              | p.Arg153Cys        | 4    | 3           |
|                    | 4  | 57  | M   | c.486C>G              | p.Cys162Trp        | 4    | 4           |
|                    | 5  | 47  | F   | c.544C>T              | p.Arg182Cys        | 4    | 4           |
|                    | 6  | 56  | M   | c.619C>T              | p.Arg207Cys        | 4    | 5           |
| HR-EGFr 26         | 7  | 48  | M   | c.3043 T>C            | p.Cys1015Arg       | 19   | 26          |
|                    | 8  | 54  | M   | c.3043T>C             | p.Cys1015Arg       | 19   | 26          |
|                    | 9  | 59  | M   | c.3043T>C             | p.Cys1015Arg       | 19   | 26          |
|                    | 10 | 59  | F   | c.3043T>C             | p.Cys1015Arg       | 19   | 26          |
|                    | 11 | 52  | M   | c.3091C>T             | p.Arg1031Cys       | 19   | 26          |
|                    | 12 | 56  | M   | c.3091C>T             | p.Arg1031Cys       | 19   | 26          |
| MR-EGFr            | 13 | 54  | M   | c.1591T>G             | p.Cys531Gly        | 10   | 13          |
|                    | 14 | 52  | F   | c.1672C>T             | p.Arg558Cys        | 11   | 14          |
|                    | 15 | 54  | M   | c.1703G>A             | p.Cys568Tyr        | 11   | 14          |
|                    | 16 | 50  | M   | c.1732C>T             | p.Arg578Cys        | 11   | 14          |
|                    | 17 | 52  | F   | c.1759C>T             | p.Arg587Cys        | 11   | 15          |
|                    | 18 | 55  | M   | c.1999G>T             | p.Gly667Cys        | 13   | 17          |
| LR-EGFr            | 19 | 48  | F   | c.2182C>T             | p.Arg728Cys        | 14   | 18          |
|                    | 20 | 49  | M   | c.3691C>T             | p.Arg1231Cys       | 22   | 31          |
|                    | 21 | 60  | F   | c.3691C>T             | p.Arg1231Cys       | 22   | 31          |



**Supplementary Table 4. Individuals with a *NOTCH3*<sup>CVS</sup> variant in CADASIL cohorts and population databases.**

|                             | Individuals with<br><i>NOTCH3</i> <sup>CVS</sup> variant | % of<br>total | Weight in the<br>calculation of<br>NVFOR |
|-----------------------------|----------------------------------------------------------|---------------|------------------------------------------|
| <b>CADASIL cohorts</b>      |                                                          |               |                                          |
| Netherlands                 | 950                                                      | 36.9          | 0.52                                     |
| Germany                     | 497                                                      | 19.3          | 1                                        |
| China                       | 263                                                      | 10.2          | 1                                        |
| Italy                       | 242                                                      | 9.4           | 1                                        |
| Japan                       | 180                                                      | 7.0           | 1                                        |
| United Kingdom              | 171                                                      | 6.6           | 1                                        |
| Korea                       | 114                                                      | 4.4           | 1                                        |
| Taiwan                      | 112                                                      | 4.4           | 1                                        |
| France                      | 45                                                       | 1.7           | 1                                        |
| <b>Total</b>                | <b>2574</b>                                              | <b>100</b>    |                                          |
| <b>Population databases</b> |                                                          |               |                                          |
| UK Biobank                  | 1003                                                     | 61.0          | 0.47                                     |
| gnomAD                      | 473                                                      | 28.7          | 1                                        |
| DiscovEHR                   | 131                                                      | 8.0           | 1                                        |
| BRAVO                       | 40                                                       | 2.4           | 1                                        |
| <b>Total</b>                | <b>1647</b>                                              | <b>100</b>    |                                          |

Supplementary Table 5. Statistically significant differences in the burden of SVD imaging markers, risk of stroke and disability between EGFr domains with the highest frequency of *NOTCH3*<sup>cys</sup> variants in the CADASIL and population datasets.

| Dataset | Outcome             | Comparison     | <i>P</i>       | <i>P</i> <sub>corr</sub> * |       |
|---------|---------------------|----------------|----------------|----------------------------|-------|
| CADASIL | nWMHv               | EGFr 1 vs. 5   | 0.006          | 0.085                      |       |
|         |                     | EGFr 1 vs. 14  | <.0001         | <.0001                     |       |
|         |                     | EGFr 2 vs. 4   | 0.001          | 0.019                      |       |
|         |                     | EGFr 2 vs. 5   | <.0001         | <.001                      |       |
|         |                     | EGFr 2 vs. 14  | <.0001         | <.0001                     |       |
|         |                     | EGFr 3 vs. 4   | <.0001         | <.001                      |       |
|         |                     | EGFr 3 vs. 5   | <.0001         | <.0001                     |       |
|         |                     | EGFr 3 vs. 14  | <.0001         | <.0001                     |       |
|         |                     | EGFr 4 vs. 5   | 0.031          | 0.31                       |       |
|         |                     | EGFr 4 vs. 14  | <.0001         | <.0001                     |       |
|         |                     | EGFr 5 vs. 14  | <.001          | 0.014                      |       |
|         |                     | EGFr 5 vs. 26  | 0.024          | 0.26                       |       |
|         |                     | EGFr 14 vs. 26 | <.0001         | <.0001                     |       |
|         | PSMD                | EGFr 2 vs. 5   | 0.001          | 0.014                      |       |
|         |                     | EGFr 2 vs. 14  | <.0001         | <.0001                     |       |
|         |                     | EGFr 3 vs. 4   | <.001          | 0.009                      |       |
|         |                     | EGFr 3 vs. 5   | <.0001         | <.001                      |       |
|         |                     | EGFr 3 vs. 14  | <.0001         | <.0001                     |       |
|         |                     | EGFr 4 vs. 14  | <.0001         | <.0001                     |       |
|         |                     | EGFr 5 vs. 14  | <.001          | 0.003                      |       |
|         | nLV                 | EGFr 2 vs. 5   | <.001          | <.0001                     |       |
|         |                     | EGFr 2 vs. 14  | <.0001         | 0.006                      |       |
|         |                     | EGFr 3 vs. 5   | <.0001         | <.0001                     |       |
|         |                     | EGFr 3 vs. 14  | <.0001         | <.001                      |       |
|         |                     | EGFr 4 vs. 5   | 0.004          | 0.057                      |       |
|         |                     | EGFr 4 vs. 14  | <.0001         | <.0001                     |       |
|         | Age at first stroke | EGFr 2 vs. 14  | 0.004          | 0.055                      |       |
|         |                     | EGFr 3 vs. 5   | 0.002          | 0.033                      |       |
|         |                     | EGFr 3 vs. 14  | <.0001         | <.0001                     |       |
|         |                     | EGFr 4 vs. 5   | 0.045          | 0.68                       |       |
|         |                     | EGFr 4 vs. 14  | <.001          | 0.0051                     |       |
|         | Disability          | EGFr 14 vs. 26 | 0.006          | 0.091                      |       |
|         |                     | EGFr 2 vs. 14  | 0.029          | 0.43                       |       |
|         | Population          | nWMH volume    | EGFr 3 vs. 14  | 0.021                      | 0.32  |
|         |                     |                | EGFr 2 vs. 14  | 0.028                      | 0.070 |
|         |                     | PSMD           | EGFr 30 vs. 31 | 0.021                      | 0.054 |
|         | Age at first stroke | EGFr 14 vs. 30 | 0.028          | 0.41                       |       |

\* = P-value after correction for multiple testing

**Supplementary Table 6. The burden of SVD imaging markers, risk of stroke and disability of the EGFr domains with the highest frequency of *NOTCH3*<sup>cy5</sup> variants in the CADASIL and population datasets.**

| Dataset    | Comparison | nWMHv *               | PSMD †                | nLV ‡                   | Risk of stroke        | Disability            |
|------------|------------|-----------------------|-----------------------|-------------------------|-----------------------|-----------------------|
|            |            | B<br>[95% CI]         | B<br>[95% CI]         | OR<br>[95% CI]          | HR<br>[95% CI]        | OR<br>[95% CI]        |
| CADASIL    | EGFr 1     | 2.44<br>[2.01 – 2.87] | x                     | x                       | x                     | x                     |
|            | EGFr 2     | 2.57<br>[2.25 – 2.88] | 6.42<br>[6.28 – 6.56] | 12.34<br>[4.45 – 35.17] | 3.23<br>[1.46 – 7.14] | 2.67<br>[1.10 – 6.51] |
|            | EGFr 3     | 2.55<br>[2.30 – 2.79] | 6.43<br>[6.32 – 6.54] | 11.08<br>[4.86 – 26.15] | 4.88<br>[2.57 – 9.29] | 2.28<br>[1.12 – 4.72] |
|            | EGFr 4     | 2.09<br>[1.87 – 2.32] | 6.26<br>[6.16 – 6.36] | 6.41<br>[2.84 – 14.94]  | 3.36<br>[1.73 – 6.51] | 1.71<br>[0.83 – 3.59] |
|            | EGFr 5     | 1.81<br>[1.55 – 2.07] | 6.18<br>[6.06 – 6.29] | 1.80<br>[0.78 – 4.17]   | 1.58<br>[0.72 – 3.48] | 1.17<br>[0.54 – 2.49] |
|            | EGFr 14    | 1.37<br>[1.13 – 1.62] | 5.97<br>[5.86 – 6.08] | 1<br>[reference]        | 1<br>[reference]      | 1<br>[reference]      |
|            | EGFr 26    | 2.25<br>[1.86 – 2.65] | 6.39<br>[6.21 – 6.57] | 5.10<br>[1.66 – 16.00]  | 3.30<br>[1.41 – 7.75] | 1.80<br>[0.67 – 4.82] |
| Population | EGFr 14    | -                     | -                     | -                       | 2.46<br>[0.74 – 8.14] | -                     |
|            | EGFr 16    | -                     | -                     | -                       | 0.58<br>[0.08 – 4.37] | -                     |
|            | EGFr 18    | -                     | -                     | -                       | NA                    | -                     |
|            | EGFr 20    | -                     | -                     | -                       | 0.42<br>[0.06 – 3.08] | -                     |
|            | EGFr 29    | 0.65<br>[0.47 – 0.83] | 5.46<br>[5.37 – 5.56] | -                       | 0.75<br>[0.36 – 1.56] | -                     |
|            | EGFr 30    | 0.56<br>[0.35 – 0.78] | 5.42<br>[5.30 – 5.53] | -                       | 0.19<br>[0.03 – 1.40] | -                     |
|            | EGFr 31    | 0.80<br>[0.66 – 0.94] | 5.55<br>[5.48 – 5.63] | -                       | 1<br>[reference]      | -                     |

Abbreviations: nWMHv = normalized white matter hyperintensity volume; PSMD = peak width of skeletonized mean diffusivity; nLV = normalized lacune volume.

\* = nWMHv was square root transformed

† = PSMD was natural log transformed

‡ = normalized lacune volume was stratified in 5 quantiles

**Supplementary Table 7. Frequency of *NOTCH3*<sup>Cys</sup> variants in CADASIL cohorts and population databases used for the calculation of the *NOTCH3*<sup>Cys</sup> Variant Frequency Odds Ratio.**

Abbreviations: BRA = BRAVO; CHI = China; DIS = DiscovEHR; FRA = France; GER = Germany; GNO = GnomAD; ITA = Italy; JAP= Japan; KOR = Korea; NL = the Netherlands; TAI = Taiwan; UK = United Kingdom; UKB = UK Biobank.

| Genetic information |      |      | CADASIL |     |     |     |     |    |     |     |     | Population |     |     |     |
|---------------------|------|------|---------|-----|-----|-----|-----|----|-----|-----|-----|------------|-----|-----|-----|
| p.mut               | exon | EGFR | NL      | GER | CHI | ITA | JAP | UK | KOR | TAI | FRA | UKB        | GNO | DIS | BRA |
| p.Cys43Gly          | 2    | 1    | 0       | 3   | 0   | 0   | 0   | 0  | 0   | 0   | 0   | 0          | 0   | 0   | 0   |
| p.Cys43Tyr          | 2    | 1    | 0       | 0   | 1   | 0   | 0   | 0  | 0   | 0   | 0   | 0          | 0   | 0   | 0   |
| p.Cys43Phe          | 2    | 1    | 1       | 0   | 0   | 0   | 1   | 0  | 0   | 0   | 0   | 0          | 0   | 0   | 0   |
| p.Cys43Arg          | 2    | 1    | 0       | 2   | 0   | 0   | 0   | 0  | 0   | 0   | 0   | 0          | 0   | 0   | 0   |
| p.Cys49Tyr          | 2    | 1    | 0       | 0   | 0   | 2   | 0   | 0  | 0   | 0   | 1   | 0          | 0   | 0   | 0   |
| p.Cys49Phe          | 2    | 1    | 0       | 2   | 0   | 0   | 0   | 0  | 0   | 1   | 0   | 0          | 0   | 0   | 0   |
| p.Cys49Arg          | 2    | 1    | 0       | 0   | 6   | 0   | 0   | 0  | 0   | 0   | 0   | 0          | 0   | 0   | 0   |
| p.Gly53Cys          | 2    | 1    | 0       | 0   | 1   | 0   | 0   | 0  | 0   | 0   | 0   | 0          | 0   | 0   | 0   |
| p.Arg54Cys          | 2    | 1    | 6       | 0   | 0   | 3   | 3   | 3  | 2   | 1   | 0   | 1          | 0   | 0   | 0   |
| p.Cys55Arg          | 2    | 1    | 0       | 0   | 0   | 0   | 1   | 0  | 0   | 0   | 0   | 0          | 0   | 0   | 0   |
| p.Cys55Gly          | 2    | 1    | 0       | 0   | 0   | 0   | 2   | 0  | 0   | 0   | 0   | 0          | 0   | 0   | 0   |
| p.Cys55Ser          | 2    | 1    | 0       | 0   | 0   | 0   | 0   | 0  | 1   | 0   | 0   | 0          | 0   | 0   | 0   |
| p.Ser60Cys          | 2    | 1    | 1       | 3   | 0   | 0   | 0   | 0  | 0   | 0   | 0   | 0          | 0   | 0   | 0   |
| p.Cys65Tyr          | 2    | 1    | 0       | 0   | 0   | 2   | 1   | 0  | 0   | 0   | 0   | 0          | 0   | 0   | 0   |
| p.Cys65Ser          | 2    | 1    | 0       | 5   | 0   | 2   | 3   | 0  | 0   | 0   | 0   | 0          | 0   | 0   | 0   |
| p.Cys67Ser          | 3    | 1    | 0       | 0   | 0   | 0   | 0   | 0  | 0   | 0   | 0   | 0          | 0   | 0   | 0   |
| p.Trp71Cys          | 3    | 1    | 0       | 0   | 1   | 0   | 1   | 0  | 0   | 0   | 1   | 0          | 0   | 0   | 0   |
| p.Cys76Arg          | 3    | 1    | 0       | 0   | 0   | 0   | 0   | 1  | 0   | 0   | 0   | 0          | 0   | 0   | 0   |
| p.Cys76Tyr          | 3    | 1    | 3       | 0   | 0   | 0   | 2   | 0  | 0   | 0   | 0   | 0          | 0   | 0   | 0   |
| p.Cys76Trp          | 3    | 1    | 0       | 2   | 0   | 0   | 0   | 0  | 0   | 0   | 0   | 0          | 0   | 0   | 0   |
| p.Cys82Phe          | 3    | 2    | 0       | 0   | 0   | 0   | 0   | 0  | 0   | 0   | 0   | 0          | 0   | 0   | 3   |
| p.Gly85Cys          | 3    | 2    | 0       | 0   | 0   | 0   | 0   | 0  | 0   | 0   | 0   | 0          | 0   | 0   | 0   |
| p.Cys87Arg          | 3    | 2    | 0       | 1   | 0   | 0   | 0   | 0  | 0   | 0   | 0   | 0          | 0   | 0   | 0   |
| p.Cys87Tyr          | 3    | 2    | 0       | 1   | 0   | 0   | 0   | 0  | 0   | 0   | 0   | 0          | 0   | 0   | 0   |
| p.Cys87Phe          | 3    | 2    | 0       | 0   | 0   | 0   | 1   | 0  | 0   | 0   | 0   | 0          | 0   | 0   | 0   |
| p.Arg90Cys          | 3    | 2    | 5       | 48  | 26  | 6   | 3   | 7  | 2   | 2   | 4   | 1          | 0   | 0   | 0   |
| p.Cys93Phe          | 3    | 2    | 0       | 6   | 0   | 0   | 0   | 0  | 0   | 0   | 0   | 0          | 0   | 0   | 0   |
| p.Cys93Gly          | 3    | 2    | 0       | 0   | 0   | 0   | 2   | 0  | 0   | 0   | 0   | 0          | 0   | 0   | 0   |
| p.Cys93Tyr          | 3    | 2    | 0       | 1   | 0   | 0   | 2   | 0  | 0   | 0   | 0   | 0          | 0   | 0   | 0   |
| p.Cys106Arg         | 3    | 2    | 0       | 0   | 0   | 0   | 2   | 0  | 0   | 0   | 0   | 0          | 0   | 0   | 0   |
| p.Cys106Trp         | 3    | 2    | 0       | 1   | 0   | 0   | 0   | 0  | 0   | 0   | 0   | 0          | 0   | 0   | 0   |
| p.Cys108Arg         | 3    | 2    | 0       | 0   | 1   | 0   | 0   | 0  | 0   | 0   | 0   | 0          | 0   | 0   | 0   |
| p.Cys108Gly         | 3    | 2    | 0       | 0   | 1   | 0   | 0   | 0  | 0   | 0   | 0   | 0          | 0   | 0   | 0   |
| p.Cys108Phe         | 3    | 2    | 0       | 0   | 0   | 0   | 2   | 0  | 0   | 0   | 0   | 0          | 0   | 0   | 0   |
| p.Cys108Tyr         | 3    | 2    | 0       | 1   | 0   | 0   | 0   | 0  | 0   | 0   | 0   | 0          | 0   | 0   | 0   |
| p.Cys108Ser         | 3    | 2    | 0       | 0   | 0   | 2   | 0   | 0  | 0   | 0   | 0   | 0          | 0   | 0   | 0   |
| p.Arg110Cys         | 3    | 2    | 26      | 13  | 11  | 4   | 2   | 3  | 4   | 2   | 2   | 2          | 0   | 0   | 0   |
| p.Cys117Arg         | 4    | 2    | 0       | 0   | 1   | 2   | 0   | 0  | 0   | 0   | 0   | 0          | 0   | 0   | 0   |
| p.Cys117Tyr         | 4    | 2    | 2       | 0   | 0   | 0   | 0   | 0  | 0   | 0   | 0   | 0          | 0   | 0   | 0   |
| p.Cys117Phe         | 4    | 2    | 0       | 11  | 1   | 0   | 0   | 0  | 0   | 0   | 0   | 0          | 0   | 0   | 0   |
| p.Cys117Thr         | 4    | 2    | 0       | 1   | 0   | 0   | 0   | 0  | 0   | 0   | 0   | 0          | 0   | 0   | 0   |
| p.Cys117Trp         | 4    | 2    | 0       | 0   | 1   | 0   | 0   | 0  | 0   | 0   | 0   | 0          | 0   | 0   | 0   |
| p.Ser118Cys         | 4    | 2    | 0       | 0   | 0   | 0   | 0   | 0  | 0   | 5   | 0   | 0          | 0   | 0   | 0   |
| p.Cys123Phe         | 4    | 3    | 0       | 5   | 0   | 0   | 0   | 0  | 0   | 0   | 0   | 0          | 0   | 0   | 0   |
| p.Cys123Thr         | 4    | 3    | 0       | 0   | 0   | 0   | 0   | 0  | 1   | 0   | 0   | 0          | 0   | 0   | 0   |
| p.Ser126Cys         | 4    | 3    | 0       | 0   | 0   | 0   | 0   | 0  | 0   | 0   | 0   | 0          | 0   | 0   | 0   |
| p.Cys128Phe         | 4    | 3    | 0       | 0   | 0   | 0   | 0   | 0  | 0   | 0   | 0   | 0          | 0   | 0   | 0   |
| p.Arg133Cys         | 4    | 3    | 32      | 61  | 7   | 7   | 11  | 4  | 4   | 3   | 3   | 0          | 3   | 0   | 0   |
| p.Cys134Tyr         | 4    | 3    | 0       | 0   | 1   | 1   | 0   | 0  | 0   | 0   | 0   | 0          | 0   | 0   | 0   |
| p.Cys134Gly         | 4    | 3    | 0       | 0   | 1   | 0   | 0   | 0  | 0   | 0   | 0   | 0          | 0   | 0   | 0   |
| p.Cys134Trp         | 4    | 3    | 3       | 2   | 0   | 0   | 0   | 0  | 0   | 0   | 0   | 0          | 0   | 0   | 0   |
| p.Arg141Cys         | 4    | 3    | 76      | 18  | 12  | 11  | 22  | 33 | 2   | 2   | 6   | 5          | 0   | 0   | 0   |

|             |   |   |     |    |    |    |    |    |   |   |   |   |   |   |   |
|-------------|---|---|-----|----|----|----|----|----|---|---|---|---|---|---|---|
| p.Phe142Cys | 4 | 3 | 0   | 0  | 0  | 0  | 0  | 0  | 0 | 0 | 0 | 0 | 0 | 0 | 0 |
| p.Cys144Ser | 4 | 3 | 0   | 1  | 1  | 0  | 0  | 0  | 0 | 0 | 0 | 0 | 0 | 0 | 0 |
| p.Cys144Phe | 4 | 3 | 6   | 0  | 0  | 1  | 0  | 0  | 0 | 0 | 0 | 0 | 0 | 0 | 0 |
| p.Cys144Tyr | 4 | 3 | 0   | 4  | 7  | 0  | 0  | 0  | 0 | 0 | 0 | 0 | 0 | 0 | 0 |
| p.Cys144Trp | 4 | 3 | 1   | 0  | 0  | 0  | 0  | 0  | 0 | 0 | 0 | 0 | 0 | 0 | 0 |
| p.Cys144Thr | 4 | 3 | 0   | 1  | 0  | 0  | 0  | 0  | 0 | 0 | 0 | 0 | 0 | 0 | 0 |
| p.Ser145Cys | 4 | 3 | 0   | 1  | 0  | 0  | 0  | 0  | 0 | 0 | 0 | 0 | 0 | 0 | 0 |
| p.Cys146Arg | 4 | 3 | 0   | 0  | 1  | 0  | 0  | 0  | 0 | 0 | 1 | 0 | 0 | 0 | 0 |
| p.Cys146Trp | 4 | 3 | 0   | 0  | 0  | 0  | 1  | 0  | 0 | 0 | 0 | 0 | 0 | 0 | 0 |
| p.Cys146Tyr | 4 | 3 | 0   | 0  | 0  | 0  | 0  | 0  | 0 | 0 | 0 | 1 | 0 | 0 | 0 |
| p.Gly149Cys | 4 | 3 | 0   | 9  | 0  | 0  | 0  | 0  | 0 | 0 | 0 | 0 | 0 | 0 | 0 |
| p.Tyr150Cys | 4 | 3 | 0   | 10 | 0  | 0  | 0  | 0  | 0 | 0 | 0 | 0 | 0 | 0 | 0 |
| p.Arg153Cys | 4 | 3 | 56  | 14 | 16 | 2  | 9  | 14 | 0 | 1 | 2 | 1 | 0 | 0 | 0 |
| p.Ser154Cys | 4 | 3 | 0   | 0  | 0  | 0  | 0  | 0  | 0 | 0 | 0 | 0 | 0 | 0 | 0 |
| p.Cys155Trp | 4 | 3 | 0   | 0  | 1  | 0  | 0  | 0  | 0 | 0 | 0 | 0 | 0 | 0 | 0 |
| p.Cys155Ser | 4 | 3 | 0   | 3  | 0  | 0  | 0  | 0  | 0 | 0 | 0 | 0 | 0 | 0 | 0 |
| p.Cys155Tyr | 4 | 3 | 2   | 1  | 0  | 0  | 0  | 0  | 0 | 0 | 0 | 0 | 0 | 0 | 0 |
| p.Trp156Cys | 4 | 3 | 0   | 0  | 0  | 0  | 0  | 0  | 0 | 0 | 0 | 0 | 1 | 0 | 0 |
| p.Cys162Ser | 4 | 4 | 0   | 0  | 1  | 0  | 0  | 0  | 0 | 0 | 0 | 0 | 0 | 0 | 0 |
| p.Cys162Trp | 4 | 4 | 20  | 0  | 0  | 0  | 0  | 0  | 0 | 0 | 0 | 0 | 0 | 0 | 0 |
| p.Cys162Tyr | 4 | 4 | 1   | 0  | 0  | 0  | 0  | 0  | 0 | 0 | 0 | 0 | 0 | 0 | 0 |
| p.Gly165Cys | 4 | 4 | 0   | 1  | 0  | 0  | 0  | 0  | 0 | 0 | 0 | 0 | 0 | 0 | 0 |
| p.Arg169Cys | 4 | 4 | 10  | 43 | 25 | 6  | 6  | 30 | 3 | 1 | 5 | 2 | 0 | 0 | 0 |
| p.His170Cys | 4 | 4 | 0   | 0  | 1  | 0  | 0  | 0  | 0 | 0 | 0 | 0 | 0 | 0 | 0 |
| p.Gly171Cys | 4 | 4 | 0   | 0  | 1  | 0  | 0  | 0  | 0 | 0 | 1 | 0 | 0 | 0 | 0 |
| p.Cys174Arg | 4 | 4 | 0   | 3  | 0  | 0  | 0  | 0  | 1 | 0 | 0 | 0 | 0 | 0 | 0 |
| p.Cys174Tyr | 4 | 4 | 0   | 21 | 0  | 1  | 0  | 0  | 0 | 0 | 0 | 0 | 0 | 0 | 0 |
| p.Ser180Cys | 4 | 4 | 0   | 0  | 0  | 0  | 9  | 0  | 0 | 0 | 0 | 0 | 0 | 0 | 0 |
| p.Arg182Cys | 4 | 4 | 58  | 94 | 15 | 6  | 15 | 24 | 2 | 0 | 3 | 7 | 1 | 0 | 0 |
| p.Cys183Arg | 4 | 4 | 0   | 3  | 0  | 0  | 0  | 3  | 0 | 0 | 0 | 0 | 0 | 0 | 0 |
| p.Cys183Tyr | 4 | 4 | 6   | 0  | 0  | 0  | 0  | 0  | 0 | 0 | 0 | 0 | 0 | 0 | 0 |
| p.Cys183Ser | 4 | 4 | 0   | 2  | 0  | 1  | 0  | 0  | 0 | 0 | 0 | 0 | 0 | 0 | 0 |
| p.Cys183Phe | 4 | 4 | 0   | 4  | 0  | 0  | 0  | 0  | 0 | 0 | 0 | 0 | 0 | 0 | 0 |
| p.Cys185Arg | 4 | 4 | 1   | 12 | 0  | 0  | 0  | 0  | 0 | 0 | 1 | 0 | 0 | 0 | 0 |
| p.Cys185Ser | 4 | 4 | 0   | 0  | 0  | 0  | 0  | 0  | 0 | 0 | 0 | 0 | 0 | 0 | 0 |
| p.Cys185Tyr | 4 | 4 | 0   | 0  | 1  | 0  | 5  | 0  | 0 | 0 | 0 | 0 | 0 | 0 | 0 |
| p.Cys185Gly | 4 | 4 | 0   | 0  | 0  | 2  | 0  | 0  | 0 | 0 | 0 | 0 | 0 | 0 | 0 |
| p.Tyr189Cys | 4 | 4 | 6   | 0  | 1  | 0  | 0  | 1  | 0 | 0 | 0 | 0 | 0 | 0 | 0 |
| p.Cys194Arg | 4 | 4 | 0   | 0  | 1  | 0  | 0  | 0  | 4 | 0 | 0 | 0 | 0 | 0 | 0 |
| p.Cys194Ser | 4 | 4 | 0   | 0  | 1  | 0  | 0  | 5  | 0 | 0 | 0 | 0 | 0 | 0 | 0 |
| p.Cys194Tyr | 4 | 4 | 0   | 0  | 3  | 0  | 1  | 0  | 0 | 0 | 0 | 0 | 0 | 0 | 0 |
| p.Cys194Phe | 4 | 4 | 0   | 1  | 0  | 0  | 0  | 0  | 0 | 0 | 0 | 0 | 0 | 0 | 0 |
| p.Cys201Arg | 4 | 5 | 0   | 0  | 0  | 0  | 0  | 0  | 0 | 0 | 0 | 0 | 0 | 0 | 0 |
| p.Cys201Ser | 4 | 5 | 0   | 0  | 1  | 0  | 0  | 0  | 0 | 0 | 0 | 0 | 0 | 1 | 0 |
| p.Cys201Tyr | 4 | 5 | 0   | 2  | 0  | 0  | 0  | 0  | 0 | 0 | 0 | 0 | 0 | 0 | 0 |
| p.Cys206Ser | 4 | 5 | 0   | 1  | 0  | 0  | 0  | 0  | 0 | 0 | 0 | 0 | 0 | 0 | 0 |
| p.Arg207Cys | 4 | 5 | 109 | 6  | 1  | 13 | 2  | 6  | 0 | 0 | 0 | 2 | 2 | 0 | 0 |
| p.Cys212Arg | 4 | 5 | 0   | 0  | 0  | 0  | 2  | 0  | 0 | 0 | 0 | 0 | 0 | 0 | 0 |
| p.Cys212Trp | 4 | 5 | 0   | 0  | 1  | 0  | 0  | 0  | 0 | 0 | 0 | 0 | 0 | 0 | 0 |
| p.Cys212Ser | 4 | 5 | 13  | 0  | 0  | 0  | 0  | 0  | 0 | 0 | 1 | 0 | 0 | 0 | 0 |
| p.Cys212Tyr | 4 | 5 | 0   | 1  | 0  | 0  | 0  | 0  | 0 | 0 | 0 | 0 | 0 | 0 | 0 |
| p.Cys222Gly | 4 | 5 | 0   | 0  | 0  | 0  | 0  | 0  | 0 | 0 | 1 | 0 | 0 | 0 | 0 |
| p.Cys222Arg | 4 | 5 | 0   | 0  | 0  | 0  | 0  | 1  | 0 | 0 | 0 | 0 | 0 | 0 | 0 |
| p.Cys222Ser | 4 | 5 | 0   | 0  | 2  | 0  | 0  | 0  | 0 | 1 | 0 | 0 | 0 | 0 | 0 |
| p.Cys222Tyr | 4 | 5 | 9   | 1  | 0  | 0  | 0  | 0  | 0 | 0 | 0 | 0 | 0 | 0 | 0 |
| p.Cys222Thr | 4 | 5 | 0   | 2  | 0  | 0  | 0  | 0  | 0 | 0 | 0 | 0 | 0 | 0 | 0 |
| p.Cys222Phe | 4 | 5 | 0   | 0  | 1  | 0  | 0  | 0  | 0 | 0 | 0 | 0 | 0 | 0 | 0 |
| p.Cys224Arg | 4 | 5 | 0   | 0  | 0  | 0  | 0  | 0  | 0 | 1 | 0 | 0 | 0 | 0 | 0 |
| p.Cys224Tyr | 4 | 5 | 4   | 0  | 0  | 0  | 0  | 0  | 0 | 0 | 1 | 0 | 0 | 0 | 0 |
| p.Phe228Cys | 5 | 5 | 0   | 0  | 0  | 0  | 0  | 1  | 0 | 0 | 0 | 0 | 0 | 0 | 0 |
| p.Cys233Ser | 5 | 5 | 0   | 0  | 0  | 0  | 1  | 0  | 0 | 0 | 0 | 0 | 0 | 0 | 0 |
| p.Cys233Arg | 5 | 5 | 0   | 0  | 1  | 1  | 0  | 0  | 0 | 0 | 0 | 0 | 0 | 0 | 0 |
| p.Cys233Tyr | 5 | 5 | 1   | 1  | 0  | 0  | 0  | 0  | 1 | 0 | 0 | 0 | 0 | 0 | 0 |
| p.Cys233Trp | 5 | 5 | 3   | 0  | 0  | 0  | 0  | 0  | 0 | 0 | 0 | 0 | 0 | 0 | 0 |
| p.Cys240Tyr | 5 | 6 | 0   | 0  | 0  | 0  | 0  | 0  | 0 | 0 | 0 | 0 | 0 | 0 | 1 |
| p.Cys240Ser | 5 | 6 | 0   | 1  | 1  | 2  | 0  | 0  | 0 | 0 | 0 | 0 | 0 | 0 | 0 |

|             |   |    |    |   |   |    |   |    |    |   |   |   |   |   |   |
|-------------|---|----|----|---|---|----|---|----|----|---|---|---|---|---|---|
| p.Cys245Arg | 5 | 6  | 0  | 1 | 0 | 0  | 0 | 0  | 0  | 0 | 0 | 0 | 0 | 0 | 0 |
| p.Cys245Ser | 5 | 6  | 0  | 0 | 0 | 0  | 0 | 2  | 0  | 0 | 0 | 0 | 0 | 0 | 0 |
| p.Cys245Tyr | 5 | 6  | 0  | 0 | 0 | 0  | 1 | 0  | 0  | 0 | 0 | 0 | 0 | 0 | 0 |
| p.Cys251Arg | 5 | 6  | 0  | 0 | 1 | 2  | 0 | 5  | 0  | 0 | 0 | 0 | 0 | 0 | 0 |
| p.Cys251Tyr | 5 | 6  | 0  | 0 | 1 | 1  | 0 | 0  | 0  | 0 | 0 | 0 | 0 | 0 | 0 |
| p.Cys251Ser | 5 | 6  | 1  | 0 | 0 | 0  | 0 | 0  | 0  | 0 | 0 | 0 | 0 | 0 | 0 |
| p.Tyr258Cys | 5 | 6  | 2  | 0 | 1 | 1  | 1 | 0  | 0  | 0 | 1 | 1 | 0 | 0 | 0 |
| p.Cys260Arg | 5 | 6  | 0  | 0 | 0 | 0  | 0 | 1  | 0  | 0 | 0 | 0 | 0 | 0 | 0 |
| p.Cys260Phe | 5 | 6  | 0  | 0 | 1 | 0  | 2 | 0  | 0  | 0 | 0 | 0 | 0 | 0 | 0 |
| p.Cys260Tyr | 5 | 6  | 0  | 3 | 0 | 0  | 0 | 1  | 0  | 0 | 0 | 0 | 0 | 0 | 0 |
| p.Cys262Arg | 5 | 6  | 0  | 0 | 0 | 1  | 0 | 0  | 0  | 0 | 0 | 0 | 0 | 0 | 0 |
| p.Cys291Tyr | 6 | 7  | 0  | 0 | 1 | 0  | 0 | 0  | 0  | 0 | 0 | 0 | 0 | 0 | 0 |
| p.Cys311Ser | 6 | 7  | 0  | 0 | 0 | 0  | 0 | 1  | 0  | 0 | 0 | 2 | 0 | 0 | 0 |
| p.Cys318Phe | 6 | 8  | 9  | 0 | 0 | 0  | 0 | 0  | 0  | 0 | 0 | 2 | 0 | 0 | 0 |
| p.Cys323Ser | 6 | 8  | 0  | 0 | 0 | 0  | 0 | 0  | 0  | 0 | 0 | 0 | 0 | 0 | 0 |
| p.Cys323Tyr | 6 | 8  | 0  | 0 | 0 | 0  | 0 | 0  | 0  | 0 | 0 | 0 | 0 | 0 | 0 |
| p.Cys323Trp | 6 | 8  | 0  | 0 | 0 | 0  | 2 | 0  | 0  | 0 | 0 | 0 | 0 | 0 | 0 |
| p.Cys329Tyr | 6 | 8  | 0  | 0 | 0 | 1  | 1 | 0  | 0  | 0 | 0 | 0 | 0 | 0 | 0 |
| p.Arg332Cys | 6 | 8  | 12 | 5 | 4 | 10 | 8 | 12 | 10 | 2 | 0 | 1 | 0 | 0 | 0 |
| p.Ser335Cys | 6 | 8  | 0  | 2 | 0 | 0  | 0 | 0  | 0  | 0 | 0 | 0 | 0 | 0 | 0 |
| p.Tyr337Cys | 6 | 8  | 3  | 8 | 1 | 0  | 0 | 0  | 0  | 0 | 0 | 1 | 0 | 0 | 1 |
| p.Cys338Arg | 6 | 8  | 0  | 0 | 0 | 1  | 0 | 0  | 0  | 0 | 0 | 0 | 1 | 0 | 0 |
| p.Cys338Ser | 6 | 8  | 0  | 0 | 1 | 0  | 0 | 0  | 0  | 0 | 0 | 0 | 0 | 0 | 0 |
| p.Cys340Phe | 6 | 8  | 3  | 0 | 0 | 0  | 0 | 0  | 0  | 0 | 0 | 0 | 0 | 0 | 0 |
| p.Cys349Ser | 7 | 8  | 0  | 0 | 0 | 0  | 0 | 0  | 0  | 0 | 0 | 0 | 1 | 0 | 0 |
| p.Cys355Ser | 7 | 9  | 0  | 0 | 0 | 0  | 0 | 0  | 0  | 0 | 0 | 0 | 0 | 0 | 0 |
| p.Cys360Tyr | 7 | 9  | 0  | 0 | 0 | 0  | 0 | 0  | 0  | 0 | 0 | 1 | 0 | 0 | 0 |
| p.Cys377Gly | 7 | 9  | 0  | 0 | 0 | 0  | 0 | 0  | 0  | 0 | 0 | 0 | 1 | 0 | 0 |
| p.Cys377Tyr | 7 | 9  | 3  | 0 | 0 | 0  | 0 | 0  | 0  | 0 | 0 | 0 | 0 | 0 | 0 |
| p.Cys379Tyr | 7 | 9  | 0  | 0 | 0 | 1  | 0 | 0  | 0  | 0 | 0 | 0 | 0 | 0 | 0 |
| p.Cys379Phe | 7 | 9  | 1  | 0 | 0 | 0  | 0 | 0  | 0  | 0 | 0 | 0 | 0 | 0 | 0 |
| p.Cys379Ser | 7 | 9  | 0  | 1 | 0 | 0  | 0 | 0  | 0  | 0 | 0 | 0 | 0 | 0 | 0 |
| p.Gly382Cys | 7 | 9  | 3  | 0 | 0 | 0  | 1 | 0  | 0  | 0 | 0 | 0 | 0 | 0 | 0 |
| p.Cys388Arg | 7 | 9  | 0  | 0 | 0 | 0  | 1 | 0  | 0  | 0 | 0 | 0 | 0 | 0 | 0 |
| p.Cys388Tyr | 7 | 9  | 0  | 0 | 0 | 0  | 3 | 0  | 0  | 0 | 0 | 0 | 0 | 0 | 0 |
| p.Cys395Arg | 7 | 10 | 0  | 1 | 0 | 0  | 0 | 0  | 0  | 0 | 0 | 0 | 0 | 0 | 0 |
| p.Ser396Cys | 7 | 10 | 4  | 0 | 0 | 3  | 1 | 0  | 0  | 0 | 0 | 0 | 0 | 0 | 0 |
| p.Cys402Ser | 8 | 10 | 0  | 0 | 0 | 0  | 0 | 0  | 0  | 0 | 0 | 0 | 0 | 0 | 0 |
| p.Cys408Arg | 8 | 10 | 0  | 0 | 0 | 0  | 0 | 0  | 0  | 0 | 0 | 1 | 0 | 0 | 0 |
| p.Cys408Gly | 8 | 10 | 0  | 0 | 0 | 0  | 0 | 0  | 0  | 0 | 0 | 0 | 0 | 0 | 0 |
| p.Cys408Tyr | 8 | 10 | 0  | 0 | 0 | 0  | 0 | 0  | 0  | 1 | 0 | 0 | 0 | 0 | 0 |
| p.Cys408Trp | 8 | 10 | 0  | 0 | 0 | 0  | 0 | 0  | 0  | 0 | 0 | 0 | 1 | 0 | 0 |
| p.Ser414Cys | 8 | 10 | 8  | 0 | 0 | 0  | 0 | 0  | 7  | 0 | 0 | 0 | 0 | 0 | 0 |
| p.Cys417Arg | 8 | 10 | 1  | 0 | 0 | 0  | 0 | 0  | 0  | 0 | 0 | 0 | 0 | 0 | 0 |
| p.Cys419Ser | 8 | 10 | 0  | 0 | 0 | 0  | 0 | 0  | 0  | 0 | 0 | 1 | 0 | 0 | 0 |
| p.Cys419Arg | 8 | 10 | 0  | 0 | 0 | 0  | 3 | 0  | 0  | 0 | 0 | 0 | 0 | 0 | 0 |
| p.Cys419Trp | 8 | 10 | 0  | 0 | 0 | 0  | 0 | 0  | 0  | 1 | 0 | 0 | 0 | 0 | 0 |
| p.Gly420Cys | 8 | 10 | 0  | 0 | 0 | 0  | 0 | 0  | 0  | 0 | 0 | 0 | 0 | 0 | 1 |
| p.Arg421Cys | 8 | 10 | 2  | 1 | 1 | 0  | 0 | 0  | 0  | 0 | 0 | 2 | 0 | 0 | 0 |
| p.Arg427Cys | 8 | 10 | 2  | 1 | 0 | 1  | 0 | 0  | 0  | 1 | 0 | 0 | 0 | 0 | 0 |
| p.Cys428Arg | 8 | 10 | 0  | 0 | 0 | 1  | 0 | 0  | 0  | 0 | 0 | 0 | 0 | 0 | 0 |
| p.Cys428Tyr | 8 | 10 | 0  | 3 | 0 | 0  | 0 | 0  | 0  | 0 | 0 | 0 | 0 | 0 | 0 |
| p.Cys435Arg | 8 | 11 | 1  | 0 | 0 | 1  | 0 | 0  | 0  | 0 | 0 | 0 | 0 | 0 | 0 |
| p.Cys435Tyr | 8 | 11 | 0  | 0 | 0 | 0  | 1 | 0  | 0  | 0 | 0 | 0 | 0 | 0 | 0 |
| p.Cys435Thr | 8 | 11 | 0  | 1 | 0 | 0  | 0 | 0  | 0  | 0 | 0 | 0 | 0 | 0 | 0 |
| p.Cys435Phe | 8 | 11 | 0  | 0 | 0 | 0  | 1 | 0  | 0  | 0 | 0 | 0 | 0 | 0 | 0 |
| p.Cys440Gly | 8 | 11 | 0  | 0 | 0 | 0  | 0 | 3  | 0  | 0 | 0 | 0 | 0 | 0 | 0 |
| p.Cys440Arg | 8 | 11 | 0  | 2 | 0 | 1  | 0 | 0  | 0  | 0 | 0 | 0 | 0 | 0 | 0 |
| p.Cys446Ser | 8 | 11 | 0  | 7 | 0 | 0  | 0 | 0  | 0  | 0 | 0 | 0 | 0 | 0 | 0 |
| p.Cys446Gly | 8 | 11 | 0  | 0 | 0 | 0  | 0 | 1  | 0  | 0 | 0 | 0 | 0 | 0 | 0 |
| p.Cys446Phe | 8 | 11 | 4  | 0 | 0 | 0  | 0 | 0  | 0  | 0 | 0 | 0 | 0 | 0 | 0 |
| p.Cys446Tyr | 8 | 11 | 0  | 0 | 0 | 1  | 0 | 0  | 0  | 0 | 0 | 0 | 0 | 0 | 0 |
| p.Arg449Cys | 8 | 11 | 14 | 0 | 0 | 0  | 0 | 0  | 0  | 0 | 0 | 0 | 0 | 0 | 0 |
| p.Cys455Arg | 8 | 11 | 0  | 0 | 0 | 0  | 1 | 0  | 1  | 0 | 0 | 0 | 0 | 0 | 0 |
| p.Cys455Phe | 8 | 11 | 0  | 0 | 0 | 1  | 0 | 0  | 0  | 0 | 0 | 0 | 0 | 0 | 0 |
| p.Cys455Tyr | 8 | 11 | 0  | 0 | 0 | 0  | 0 | 0  | 0  | 0 | 0 | 1 | 0 | 0 | 0 |

|             |    |      |     |   |    |    |   |   |    |    |   |    |    |   |   |
|-------------|----|------|-----|---|----|----|---|---|----|----|---|----|----|---|---|
| p.Cys457Ser | 8  | 11   | 0   | 0 | 0  | 0  | 1 | 0 | 0  | 0  | 0 | 0  | 0  | 0 | 0 |
| p.Tyr465Cys | 9  | 11   | 1   | 0 | 0  | 0  | 1 | 0 | 3  | 0  | 0 | 1  | 0  | 0 | 0 |
| p.Cys466Tyr | 9  | 11   | 0   | 0 | 0  | 0  | 0 | 0 | 0  | 0  | 0 | 0  | 0  | 0 | 0 |
| p.Ser476Cys | 9  | 12   | 0   | 0 | 0  | 0  | 0 | 0 | 0  | 0  | 0 | 3  | 0  | 0 | 0 |
| p.Gly481Cys | 9  | 12   | 0   | 0 | 0  | 0  | 1 | 0 | 0  | 0  | 0 | 2  | 0  | 0 | 1 |
| p.Cys484Tyr | 9  | 12   | 0   | 4 | 0  | 0  | 0 | 0 | 0  | 0  | 0 | 0  | 0  | 0 | 0 |
| p.Cys484Arg | 9  | 12   | 0   | 0 | 0  | 0  | 0 | 0 | 0  | 0  | 0 | 1  | 0  | 0 | 0 |
| p.Ser492Cys | 9  | 12   | 0   | 0 | 0  | 0  | 0 | 0 | 0  | 0  | 0 | 0  | 0  | 1 | 0 |
| p.Cys493Ser | 9  | 12   | 0   | 0 | 0  | 1  | 0 | 0 | 0  | 0  | 0 | 0  | 0  | 0 | 0 |
| p.Cys493Arg | 9  | 12   | 0   | 0 | 0  | 0  | 0 | 0 | 0  | 0  | 0 | 0  | 0  | 0 | 0 |
| p.Cys495Tyr | 9  | 12   | 0   | 1 | 0  | 0  | 0 | 0 | 0  | 0  | 0 | 0  | 0  | 0 | 0 |
| p.Cys495Gly | 9  | 12   | 0   | 0 | 0  | 0  | 0 | 0 | 0  | 0  | 0 | 1  | 0  | 0 | 0 |
| p.Gly498Cys | 10 | 12   | 7   | 0 | 0  | 0  | 0 | 0 | 0  | 0  | 0 | 0  | 0  | 0 | 0 |
| p.Cys504Arg | 10 | 12   | 0   | 0 | 0  | 0  | 0 | 0 | 0  | 0  | 0 | 1  | 0  | 0 | 0 |
| p.Cys504Gly | 10 | 12   | 0   | 0 | 0  | 0  | 0 | 0 | 0  | 0  | 0 | 0  | 0  | 0 | 0 |
| p.Cys511Arg | 10 | 13   | 0   | 1 | 0  | 0  | 0 | 0 | 0  | 0  | 0 | 0  | 0  | 1 | 0 |
| p.Cys511Tyr | 10 | 13   | 0   | 0 | 0  | 4  | 0 | 0 | 0  | 0  | 0 | 0  | 0  | 0 | 0 |
| p.Cys511Phe | 10 | 13   | 0   | 0 | 0  | 1  | 0 | 0 | 0  | 0  | 0 | 1  | 0  | 0 | 0 |
| p.Cys516Phe | 10 | 13   | 0   | 0 | 0  | 0  | 0 | 0 | 0  | 0  | 0 | 7  | 0  | 0 | 0 |
| p.Cys516Tyr | 10 | 13   | 0   | 0 | 0  | 0  | 0 | 0 | 0  | 0  | 0 | 1  | 0  | 0 | 0 |
| p.Cys522Ser | 10 | 13   | 0   | 0 | 0  | 0  | 0 | 0 | 0  | 0  | 0 | 1  | 0  | 0 | 0 |
| p.Cys522Trp | 10 | 13   | 0   | 0 | 0  | 0  | 0 | 0 | 0  | 0  | 0 | 0  | 1  | 0 | 0 |
| p.Gly528Cys | 10 | 13   | 0   | 0 | 0  | 13 | 0 | 0 | 0  | 0  | 0 | 0  | 0  | 0 | 0 |
| p.Cys531Gly | 10 | 13   | 7   | 0 | 0  | 0  | 0 | 0 | 0  | 0  | 0 | 0  | 0  | 0 | 0 |
| p.Cys531Tyr | 10 | 13   | 1   | 0 | 0  | 0  | 0 | 0 | 0  | 0  | 0 | 0  | 0  | 0 | 0 |
| p.Arg532Cys | 10 | 13   | 0   | 0 | 0  | 1  | 0 | 0 | 0  | 0  | 0 | 4  | 1  | 0 | 0 |
| p.Cys533Ser | 10 | 13   | 1   | 1 | 0  | 0  | 0 | 0 | 0  | 0  | 0 | 0  | 0  | 0 | 0 |
| p.Cys542Arg | 11 | 13   | 0   | 0 | 0  | 0  | 3 | 0 | 9  | 0  | 0 | 0  | 0  | 0 | 0 |
| p.Cys542Tyr | 11 | 13   | 0   | 0 | 0  | 0  | 1 | 0 | 1  | 0  | 1 | 0  | 0  | 0 | 0 |
| p.Arg544Cys | 11 | 13.5 | 12  | 1 | 35 | 0  | 2 | 0 | 37 | 79 | 0 | 15 | 83 | 1 | 0 |
| p.Cys549Ser | 11 | 14   | 0   | 0 | 1  | 0  | 0 | 0 | 0  | 0  | 0 | 0  | 0  | 0 | 0 |
| p.Cys549Tyr | 11 | 14   | 0   | 4 | 0  | 0  | 0 | 0 | 0  | 0  | 0 | 0  | 0  | 0 | 0 |
| p.Cys549Arg | 11 | 14   | 2   | 0 | 0  | 0  | 0 | 0 | 0  | 0  | 0 | 0  | 0  | 0 | 0 |
| p.Cys551Arg | 11 | 14   | 0   | 1 | 0  | 0  | 0 | 0 | 0  | 0  | 0 | 0  | 0  | 0 | 0 |
| p.Cys554Phe | 11 | 14   | 0   | 0 | 0  | 0  | 0 | 0 | 0  | 0  | 0 | 1  | 0  | 0 | 0 |
| p.Gly557Cys | 11 | 14   | 0   | 0 | 0  | 0  | 0 | 0 | 0  | 0  | 0 | 0  | 1  | 0 | 0 |
| p.Arg558Cys | 11 | 14   | 21  | 5 | 1  | 3  | 0 | 0 | 4  | 0  | 2 | 4  | 9  | 0 | 0 |
| p.Cys559Trp | 11 | 14   | 0   | 0 | 1  | 0  | 0 | 0 | 0  | 0  | 0 | 0  | 0  | 0 | 0 |
| p.Cys568Tyr | 11 | 14   | 9   | 0 | 0  | 0  | 0 | 0 | 0  | 0  | 0 | 0  | 0  | 0 | 0 |
| p.Tyr574Cys | 11 | 14   | 0   | 0 | 0  | 4  | 0 | 0 | 0  | 0  | 0 | 0  | 0  | 0 | 0 |
| p.Arg578Cys | 11 | 14   | 181 | 0 | 0  | 13 | 0 | 0 | 2  | 0  | 1 | 13 | 10 | 1 | 0 |
| p.Cys579Tyr | 11 | 14   | 0   | 0 | 0  | 0  | 0 | 0 | 0  | 0  | 0 | 2  | 0  | 0 | 0 |
| p.Arg587Cys | 11 | 15   | 8   | 0 | 6  | 0  | 1 | 0 | 3  | 1  | 0 | 7  | 10 | 0 | 0 |
| p.Arg592Cys | 11 | 15   | 0   | 0 | 0  | 0  | 0 | 0 | 0  | 0  | 0 | 1  | 1  | 0 | 0 |
| p.Gly595Cys | 11 | 15   | 3   | 0 | 0  | 0  | 0 | 0 | 0  | 0  | 0 | 0  | 0  | 0 | 0 |
| p.Cys597Arg | 11 | 15   | 0   | 0 | 0  | 0  | 0 | 0 | 0  | 0  | 0 | 0  | 0  | 0 | 0 |
| p.Cys597Ser | 11 | 15   | 0   | 0 | 0  | 0  | 0 | 0 | 0  | 0  | 0 | 0  | 0  | 0 | 0 |
| p.Cys597Tyr | 11 | 15   | 3   | 0 | 0  | 0  | 0 | 0 | 0  | 0  | 0 | 0  | 0  | 0 | 0 |
| p.Tyr604Cys | 11 | 15   | 2   | 0 | 0  | 0  | 0 | 0 | 0  | 0  | 0 | 0  | 0  | 0 | 0 |
| p.Cys606Arg | 11 | 15   | 0   | 0 | 0  | 0  | 0 | 0 | 2  | 0  | 0 | 0  | 0  | 0 | 0 |
| p.Cys606Tyr | 11 | 15   | 0   | 0 | 0  | 0  | 0 | 0 | 0  | 0  | 0 | 0  | 0  | 1 | 0 |
| p.Cys606Ser | 11 | 15   | 0   | 0 | 0  | 0  | 1 | 0 | 0  | 0  | 0 | 0  | 0  | 0 | 0 |
| p.Cys606Phe | 11 | 15   | 0   | 0 | 2  | 0  | 0 | 0 | 0  | 0  | 0 | 0  | 0  | 0 | 0 |
| p.Arg607Cys | 11 | 15   | 9   | 1 | 37 | 15 | 9 | 2 | 2  | 0  | 0 | 7  | 1  | 4 | 0 |
| p.Cys608Tyr | 11 | 15   | 0   | 0 | 0  | 0  | 0 | 0 | 0  | 0  | 0 | 0  | 1  | 0 | 0 |
| p.Cys608Trp | 11 | 15   | 0   | 0 | 0  | 0  | 0 | 0 | 0  | 0  | 0 | 1  | 0  | 0 | 0 |
| p.Cys629Arg | 12 | 16   | 0   | 0 | 0  | 0  | 0 | 0 | 0  | 0  | 0 | 1  | 0  | 0 | 0 |
| p.Cys634Gly | 12 | 16   | 0   | 0 | 0  | 0  | 0 | 0 | 0  | 0  | 0 | 0  | 0  | 0 | 1 |
| p.Arg635Cys | 12 | 16   | 0   | 0 | 0  | 0  | 0 | 0 | 0  | 0  | 0 | 0  | 2  | 4 | 0 |
| p.Arg640Cys | 12 | 16   | 3   | 0 | 1  | 0  | 1 | 0 | 0  | 0  | 0 | 20 | 9  | 0 | 0 |
| p.Cys645Tyr | 12 | 16   | 0   | 0 | 0  | 0  | 0 | 0 | 0  | 0  | 0 | 1  | 0  | 0 | 0 |
| p.Cys654Gly | 13 | 16   | 0   | 0 | 0  | 0  | 0 | 0 | 0  | 0  | 0 | 0  | 0  | 1 | 0 |
| p.Cys654Tyr | 13 | 16   | 0   | 0 | 0  | 0  | 0 | 0 | 0  | 0  | 0 | 1  | 0  | 0 | 0 |
| p.Ser664Cys | 13 | 17   | 0   | 0 | 0  | 0  | 0 | 0 | 0  | 0  | 0 | 0  | 1  | 0 | 0 |
| p.Gly667Cys | 13 | 17   | 21  | 0 | 0  | 0  | 0 | 0 | 0  | 0  | 0 | 2  | 1  | 1 | 0 |
| p.Ser671Cys | 13 | 17   | 0   | 0 | 0  | 0  | 0 | 0 | 0  | 0  | 0 | 4  | 0  | 0 | 0 |

|              |    |      |    |   |   |    |   |   |   |   |   |    |    |   |   |
|--------------|----|------|----|---|---|----|---|---|---|---|---|----|----|---|---|
| p.Cys672Tyr  | 13 | 17   | 0  | 0 | 0 | 0  | 0 | 0 | 0 | 0 | 0 | 1  | 0  | 0 | 0 |
| p.Arg680Cys  | 13 | 17   | 0  | 0 | 1 | 0  | 0 | 0 | 0 | 0 | 0 | 3  | 0  | 0 | 1 |
| p.Tyr710Cys  | 13 | 18   | 3  | 0 | 0 | 0  | 0 | 0 | 0 | 0 | 0 | 1  | 0  | 0 | 2 |
| p.Arg717Cys  | 14 | 18   | 0  | 0 | 0 | 0  | 0 | 0 | 0 | 1 | 0 | 29 | 3  | 2 | 7 |
| p.Cys720Tyr  | 14 | 18   | 0  | 0 | 0 | 0  | 0 | 0 | 0 | 0 | 0 | 1  | 0  | 0 | 0 |
| p.Arg728Cys  | 14 | 18   | 15 | 0 | 0 | 2  | 0 | 0 | 0 | 0 | 1 | 15 | 0  | 2 | 2 |
| p.Cys729Gly  | 14 | 18   | 0  | 0 | 0 | 0  | 1 | 0 | 0 | 0 | 0 | 0  | 0  | 0 | 0 |
| p.Ser740Cys  | 14 | 19   | 0  | 0 | 0 | 0  | 0 | 0 | 0 | 0 | 0 | 1  | 0  | 0 | 0 |
| p.Cys743Tyr  | 14 | 19   | 0  | 0 | 0 | 0  | 1 | 0 | 0 | 0 | 0 | 0  | 0  | 0 | 0 |
| p.Cys749Tyr  | 14 | 19   | 0  | 0 | 0 | 0  | 0 | 0 | 0 | 0 | 0 | 0  | 1  | 0 | 0 |
| p.Cys758Tyr  | 14 | 19   | 0  | 0 | 0 | 0  | 0 | 0 | 0 | 0 | 0 | 1  | 0  | 0 | 0 |
| p.Arg767Cys  | 15 | 19   | 0  | 0 | 1 | 1  | 0 | 0 | 0 | 0 | 0 | 12 | 14 | 0 | 0 |
| p.Cys769Tyr  | 15 | 19   | 0  | 0 | 0 | 0  | 0 | 0 | 0 | 0 | 0 | 1  | 0  | 0 | 0 |
| p.Cys775Arg  | 15 | 20   | 0  | 0 | 0 | 0  | 0 | 0 | 0 | 0 | 0 | 0  | 1  | 0 | 0 |
| p.Arg785Cys  | 15 | 20   | 0  | 0 | 0 | 0  | 0 | 0 | 0 | 0 | 0 | 12 | 1  | 0 | 0 |
| p.Cys796Phe  | 15 | 20   | 0  | 0 | 0 | 0  | 0 | 0 | 0 | 0 | 0 | 1  | 0  | 0 | 1 |
| p.Cys796Ser  | 15 | 20   | 0  | 0 | 0 | 0  | 0 | 0 | 0 | 0 | 0 | 1  | 0  | 0 | 1 |
| p.Cys796Tyr  | 15 | 20   | 0  | 0 | 0 | 0  | 0 | 0 | 0 | 0 | 0 | 1  | 0  | 0 | 0 |
| p.Cys798Tyr  | 15 | 20   | 0  | 0 | 0 | 0  | 0 | 0 | 0 | 0 | 0 | 2  | 0  | 0 | 1 |
| p.Trp802Cys  | 15 | 20   | 0  | 0 | 0 | 0  | 0 | 0 | 0 | 0 | 0 | 6  | 0  | 0 | 0 |
| p.Phe833Cys  | 16 | 21   | 0  | 0 | 0 | 0  | 0 | 0 | 0 | 0 | 0 | 0  | 0  | 1 | 0 |
| p.Cys846Tyr  | 16 | 21   | 0  | 0 | 0 | 0  | 0 | 0 | 0 | 0 | 0 | 0  | 1  | 0 | 0 |
| p.Cys853Tyr  | 16 | 22   | 0  | 0 | 0 | 0  | 0 | 0 | 0 | 0 | 0 | 0  | 0  | 0 | 1 |
| p.Cys858Trp  | 17 | 22   | 0  | 0 | 0 | 0  | 0 | 0 | 0 | 0 | 0 | 1  | 0  | 0 | 0 |
| p.Gly861Cys  | 17 | 22   | 0  | 0 | 0 | 0  | 0 | 0 | 0 | 0 | 0 | 1  | 1  | 0 | 0 |
| p.Cys873Arg  | 17 | 22   | 0  | 0 | 0 | 0  | 0 | 0 | 0 | 0 | 0 | 1  | 0  | 0 | 0 |
| p.Arg886Cys  | 17 | 22.5 | 0  | 0 | 1 | 0  | 0 | 0 | 0 | 0 | 0 | 0  | 0  | 0 | 1 |
| p.Cys891Gly  | 17 | 23   | 0  | 0 | 0 | 0  | 0 | 0 | 0 | 0 | 0 | 0  | 1  | 0 | 0 |
| p.Cys910Tyr  | 17 | 23   | 0  | 0 | 0 | 0  | 0 | 0 | 0 | 0 | 0 | 5  | 0  | 1 | 2 |
| p.Cys910Arg  | 17 | 23   | 0  | 0 | 0 | 0  | 0 | 0 | 0 | 0 | 0 | 2  | 0  | 0 | 0 |
| p.Cys912Ser  | 17 | 23   | 0  | 0 | 0 | 0  | 0 | 0 | 0 | 0 | 0 | 2  | 0  | 0 | 0 |
| p.Tyr916Cys  | 17 | 23   | 0  | 0 | 0 | 1  | 0 | 0 | 0 | 0 | 0 | 10 | 0  | 1 | 0 |
| p.Cys928Tyr  | 17 | 24   | 0  | 0 | 0 | 0  | 0 | 0 | 0 | 0 | 0 | 0  | 0  | 0 | 1 |
| p.Ser932Cys  | 18 | 24   | 0  | 0 | 0 | 0  | 0 | 0 | 0 | 0 | 0 | 0  | 1  | 0 | 0 |
| p.Cys933Gly  | 18 | 24   | 0  | 0 | 0 | 0  | 0 | 0 | 0 | 0 | 0 | 0  | 2  | 0 | 0 |
| p.Cys939Ser  | 18 | 24   | 0  | 0 | 0 | 0  | 0 | 0 | 0 | 0 | 0 | 2  | 0  | 0 | 0 |
| p.Cys939Trp  | 18 | 24   | 0  | 0 | 0 | 0  | 0 | 0 | 0 | 0 | 0 | 0  | 0  | 1 | 0 |
| p.Gly942Cys  | 18 | 24   | 0  | 0 | 0 | 0  | 0 | 0 | 0 | 0 | 0 | 0  | 2  | 0 | 0 |
| p.Cys948Phe  | 18 | 24   | 0  | 0 | 0 | 0  | 0 | 0 | 0 | 0 | 0 | 1  | 0  | 0 | 0 |
| p.Cys950Gly  | 18 | 24   | 0  | 0 | 0 | 0  | 0 | 0 | 0 | 0 | 0 | 0  | 1  | 0 | 0 |
| p.Arg951Cys  | 18 | 24   | 0  | 0 | 0 | 1  | 0 | 0 | 0 | 0 | 0 | 1  | 2  | 0 | 0 |
| p.Gly953Cys  | 18 | 24   | 0  | 0 | 0 | 0  | 0 | 1 | 0 | 0 | 0 | 0  | 0  | 0 | 0 |
| p.Cys959Ser  | 18 | 24   | 0  | 0 | 0 | 0  | 0 | 0 | 0 | 0 | 0 | 0  | 0  | 0 | 1 |
| p.Cys971Tyr  | 18 | 25   | 0  | 0 | 0 | 0  | 0 | 0 | 0 | 0 | 0 | 1  | 0  | 0 | 0 |
| p.Gly975Cys  | 18 | 25   | 0  | 0 | 0 | 0  | 1 | 0 | 0 | 0 | 0 | 0  | 0  | 0 | 0 |
| p.Cys977Ser  | 18 | 25   | 0  | 0 | 1 | 0  | 0 | 0 | 0 | 5 | 0 | 0  | 0  | 0 | 0 |
| p.Phe984Cys  | 18 | 25   | 0  | 0 | 1 | 0  | 0 | 0 | 0 | 0 | 0 | 0  | 0  | 0 | 0 |
| p.Arg985Cys  | 18 | 25   | 0  | 6 | 0 | 5  | 1 | 0 | 0 | 0 | 2 | 0  | 0  | 0 | 0 |
| p.Cys986Arg  | 18 | 25   | 0  | 0 | 0 | 0  | 0 | 1 | 0 | 0 | 0 | 1  | 3  | 0 | 0 |
| p.Cys986Gly  | 18 | 25   | 0  | 0 | 0 | 0  | 0 | 0 | 0 | 0 | 0 | 1  | 0  | 0 | 0 |
| p.Cys988Tyr  | 18 | 25   | 0  | 0 | 1 | 0  | 0 | 0 | 0 | 0 | 0 | 0  | 0  | 0 | 0 |
| p.Cys988Arg  | 18 | 25   | 0  | 1 | 0 | 0  | 0 | 0 | 0 | 0 | 0 | 0  | 0  | 0 | 0 |
| p.Cys988Phe  | 18 | 25   | 0  | 0 | 0 | 0  | 1 | 0 | 0 | 0 | 0 | 0  | 0  | 0 | 0 |
| p.Gly994Cys  | 18 | 25   | 0  | 0 | 0 | 0  | 0 | 0 | 0 | 0 | 0 | 1  | 0  | 0 | 0 |
| p.Cys997Gly  | 18 | 25   | 0  | 0 | 0 | 8  | 0 | 0 | 0 | 0 | 0 | 0  | 0  | 0 | 0 |
| p.Cys997Ser  | 18 | 25   | 0  | 2 | 0 | 0  | 0 | 0 | 0 | 0 | 0 | 0  | 0  | 0 | 0 |
| p.Trp1003Cys | 19 | 26   | 0  | 0 | 0 | 0  | 0 | 0 | 0 | 0 | 0 | 0  | 0  | 0 | 1 |
| p.Cys1004Tyr | 19 | 26   | 0  | 0 | 0 | 0  | 0 | 0 | 0 | 0 | 0 | 1  | 0  | 0 | 0 |
| p.Cys1004Gly | 19 | 26   | 0  | 0 | 0 | 0  | 6 | 0 | 0 | 0 | 0 | 0  | 0  | 0 | 0 |
| p.Arg1006Cys | 19 | 26   | 1  | 0 | 1 | 29 | 0 | 0 | 0 | 0 | 1 | 1  | 0  | 1 | 0 |
| p.Cys1009Phe | 19 | 26   | 0  | 0 | 0 | 0  | 1 | 0 | 0 | 0 | 0 | 0  | 0  | 0 | 0 |
| p.Cys1015Arg | 19 | 26   | 80 | 0 | 0 | 0  | 1 | 0 | 0 | 0 | 0 | 1  | 0  | 0 | 0 |
| p.Cys1015Trp | 19 | 26   | 0  | 0 | 0 | 0  | 1 | 0 | 0 | 0 | 0 | 0  | 0  | 0 | 0 |
| p.Tyr1021Cys | 19 | 26   | 0  | 0 | 1 | 5  | 2 | 0 | 0 | 0 | 0 | 0  | 1  | 0 | 0 |
| p.Cys1022Gly | 19 | 26   | 0  | 0 | 0 | 0  | 1 | 0 | 0 | 0 | 0 | 0  | 0  | 0 | 0 |
| p.Arg1031Cys | 19 | 26   | 8  | 0 | 2 | 0  | 0 | 0 | 0 | 0 | 1 | 3  | 0  | 0 | 0 |



|              |    |    |             |            |            |            |            |            |            |            |           |             |            |            |           |  |
|--------------|----|----|-------------|------------|------------|------------|------------|------------|------------|------------|-----------|-------------|------------|------------|-----------|--|
| p.Cys1055Tyr | 20 | 27 | 0           | 0          | 0          | 0          | 0          | 0          | 0          | 0          | 0         | 1           | 0          | 0          | 0         |  |
| p.Gly1058Cys | 20 | 27 | 0           | 0          | 0          | 0          | 0          | 0          | 3          | 0          | 0         | 0           | 0          | 0          | 0         |  |
| p.Cys1061Arg | 20 | 27 | 0           | 0          | 0          | 0          | 0          | 0          | 0          | 0          | 0         | 0           | 2          | 0          | 0         |  |
| p.Cys1061Tyr | 20 | 27 | 0           | 0          | 0          | 0          | 0          | 0          | 0          | 0          | 0         | 3           | 0          | 0          | 0         |  |
| p.Gly1165Cys | 20 | 27 | 0           | 0          | 0          | 0          | 0          | 0          | 0          | 0          | 0         | 3           | 0          | 0          | 0         |  |
| p.Ser1067Cys | 20 | 27 | 0           | 0          | 0          | 0          | 1          | 0          | 0          | 0          | 0         | 0           | 0          | 0          | 0         |  |
| p.Tyr1069Cys | 20 | 27 | 0           | 0          | 0          | 0          | 0          | 0          | 0          | 0          | 0         | 0           | 1          | 0          | 0         |  |
| p.Cys1070Ser | 20 | 27 | 0           | 0          | 0          | 0          | 0          | 0          | 0          | 0          | 0         | 0           | 0          | 1          | 0         |  |
| p.Cys1072Tyr | 20 | 27 | 0           | 0          | 0          | 0          | 0          | 0          | 0          | 0          | 0         | 0           | 0          | 0          | 1         |  |
| p.Arg1072Cys | 20 | 27 | 0           | 2          | 0          | 0          | 0          | 0          | 0          | 0          | 0         | 0           | 0          | 0          | 0         |  |
| p.Arg1076Cys | 20 | 27 | 8           | 0          | 0          | 5          | 0          | 0          | 0          | 1          | 0         | 1           | 1          | 0          | 0         |  |
| p.Cys1099Phe | 20 | 28 | 0           | 0          | 0          | 1          | 0          | 0          | 0          | 0          | 0         | 0           | 0          | 0          | 0         |  |
| p.Arg1100Cys | 20 | 28 | 0           | 0          | 0          | 0          | 0          | 0          | 0          | 0          | 0         | 3           | 0          | 1          | 0         |  |
| p.Cys1108Arg | 20 | 28 | 0           | 0          | 0          | 0          | 0          | 0          | 0          | 0          | 0         | 2           | 0          | 0          | 0         |  |
| p.Cys1110Arg | 21 | 28 | 0           | 0          | 0          | 0          | 0          | 0          | 0          | 0          | 0         | 4           | 0          | 0          | 0         |  |
| p.Cys1110Ser | 21 | 28 | 0           | 0          | 0          | 0          | 0          | 0          | 0          | 0          | 0         | 0           | 0          | 0          | 1         |  |
| p.Cys1119Tyr | 21 | 28 | 0           | 0          | 0          | 0          | 0          | 0          | 0          | 0          | 0         | 6           | 1          | 0          | 1         |  |
| p.Cys1131Trp | 21 | 29 | 0           | 0          | 1          | 1          | 0          | 0          | 0          | 0          | 0         | 0           | 0          | 0          | 0         |  |
| p.Cys1137Arg | 21 | 29 | 0           | 0          | 0          | 0          | 0          | 0          | 0          | 0          | 0         | 1           | 0          | 0          | 0         |  |
| p.Arg1143Cys | 21 | 29 | 0           | 0          | 0          | 0          | 1          | 0          | 0          | 0          | 0         | 133         | 5          | 6          | 0         |  |
| p.Tyr1144Cys | 21 | 29 | 0           | 0          | 0          | 0          | 0          | 0          | 0          | 0          | 0         | 2           | 0          | 2          | 0         |  |
| p.Cys1148Phe | 21 | 29 | 0           | 0          | 0          | 0          | 0          | 0          | 0          | 0          | 0         | 1           | 0          | 0          | 0         |  |
| p.Cys1157Arg | 22 | 29 | 0           | 0          | 0          | 0          | 0          | 0          | 0          | 0          | 0         | 1           | 0          | 0          | 0         |  |
| p.Cys1176Tyr | 22 | 30 | 0           | 0          | 0          | 0          | 0          | 0          | 0          | 0          | 0         | 1           | 0          | 0          | 0         |  |
| p.Cys1182Trp | 22 | 30 | 0           | 0          | 0          | 0          | 0          | 0          | 0          | 0          | 0         | 1           | 0          | 0          | 0         |  |
| p.Arg1190Cys | 22 | 30 | 0           | 0          | 0          | 0          | 0          | 0          | 0          | 0          | 0         | 21          | 15         | 7          | 0         |  |
| p.Cys1191Ser | 22 | 30 | 0           | 0          | 0          | 0          | 0          | 0          | 0          | 0          | 0         | 0           | 0          | 0          | 1         |  |
| p.Cys1193Tyr | 22 | 30 | 0           | 0          | 0          | 0          | 0          | 0          | 0          | 0          | 0         | 1           | 0          | 0          | 0         |  |
| p.Arg1201Cys | 22 | 30 | 0           | 0          | 0          | 0          | 0          | 0          | 0          | 0          | 0         | 52          | 10         | 4          | 0         |  |
| p.Cys1202Ser | 22 | 30 | 0           | 0          | 0          | 0          | 0          | 0          | 0          | 0          | 0         | 0           | 1          | 0          | 0         |  |
| p.Arg1210Cys | 22 | 31 | 1           | 0          | 0          | 0          | 0          | 0          | 0          | 0          | 0         | 3           | 2          | 0          | 0         |  |
| p.Cys1222Gly | 22 | 31 | 0           | 0          | 0          | 0          | 2          | 0          | 0          | 0          | 0         | 212         | 29         | 0          | 0         |  |
| p.Cys1222Ser | 22 | 31 | 0           | 0          | 0          | 3          | 0          | 0          | 0          | 0          | 0         | 0           | 0          | 0          | 0         |  |
| p.Cys1222Arg | 22 | 31 | 0           | 0          | 0          | 0          | 0          | 0          | 0          | 0          | 0         | 1           | 0          | 0          | 0         |  |
| p.Arg1231Cys | 22 | 31 | 6           | 0          | 0          | 19         | 0          | 3          | 3          | 0          | 1         | 255         | 225        | 84         | 0         |  |
| p.Cys1232Trp | 22 | 31 | 0           | 0          | 0          | 0          | 0          | 0          | 0          | 0          | 0         | 0           | 0          | 1          | 0         |  |
| p.Arg1242Cys | 23 | 31 | 0           | 0          | 0          | 0          | 0          | 0          | 0          | 0          | 0         | 9           | 2          | 0          | 0         |  |
| p.Cys1250Arg | 23 | 32 | 0           | 0          | 0          | 0          | 0          | 0          | 0          | 0          | 0         | 1           | 0          | 0          | 0         |  |
| p.Cys1250Gly | 23 | 32 | 0           | 0          | 0          | 0          | 0          | 0          | 0          | 0          | 0         | 0           | 0          | 0          | 0         |  |
| p.Cys1261Arg | 23 | 32 | 0           | 0          | 0          | 0          | 0          | 0          | 0          | 0          | 1         | 0           | 0          | 0          | 0         |  |
| p.Cys1261Tyr | 23 | 32 | 0           | 1          | 0          | 0          | 0          | 0          | 0          | 0          | 0         | 0           | 0          | 0          | 1         |  |
| p.Cys1261Trp | 23 | 32 | 0           | 0          | 0          | 0          | 0          | 0          | 0          | 0          | 0         | 1           | 0          | 0          | 0         |  |
| p.Arg1262Cys | 23 | 32 | 0           | 0          | 0          | 0          | 0          | 0          | 0          | 0          | 0         | 1           | 0          | 0          | 0         |  |
| p.Gly1266Cys | 23 | 32 | 3           | 0          | 0          | 0          | 0          | 0          | 0          | 0          | 0         | 0           | 0          | 0          | 0         |  |
| p.Cys1275Ser | 23 | 32 | 0           | 0          | 0          | 0          | 0          | 0          | 0          | 0          | 0         | 1           | 0          | 0          | 1         |  |
| p.Cys1277Tyr | 23 | 32 | 0           | 0          | 0          | 0          | 0          | 0          | 0          | 0          | 0         | 0           | 1          | 0          | 0         |  |
| p.Gly1283Cys | 24 | 32 | 0           | 0          | 0          | 0          | 0          | 0          | 0          | 0          | 0         | 1           | 0          | 0          | 0         |  |
| p.Arg1291Cys | 24 | 33 | 0           | 0          | 0          | 0          | 0          | 0          | 0          | 0          | 0         | 2           | 0          | 0          | 0         |  |
| p.Cys1293Phe | 24 | 33 | 0           | 0          | 0          | 0          | 0          | 0          | 0          | 0          | 0         | 1           | 0          | 0          | 0         |  |
| p.Cys1293Trp | 24 | 33 | 0           | 0          | 0          | 0          | 1          | 0          | 0          | 0          | 0         | 0           | 0          | 0          | 0         |  |
| p.Cys1298Phe | 24 | 33 | 0           | 0          | 0          | 1          | 0          | 0          | 0          | 0          | 0         | 0           | 0          | 0          | 0         |  |
| p.Cys1313Gly | 24 | 33 | 0           | 0          | 0          | 0          | 0          | 0          | 0          | 0          | 0         | 0           | 0          | 0          | 1         |  |
| p.Cys1313Ser | 24 | 33 | 0           | 0          | 0          | 0          | 0          | 0          | 0          | 0          | 0         | 1           | 0          | 0          | 0         |  |
| p.Cys1315Phe | 24 | 33 | 0           | 0          | 0          | 0          | 0          | 0          | 0          | 0          | 0         | 10          | 0          | 0          | 0         |  |
| p.Cys1315Trp | 24 | 33 | 0           | 0          | 0          | 0          | 0          | 0          | 0          | 0          | 0         | 1           | 0          | 0          | 1         |  |
| p.Cys1315Tyr | 24 | 33 | 0           | 0          | 0          | 1          | 0          | 0          | 0          | 0          | 0         | 0           | 0          | 0          | 0         |  |
| p.Cys1324Ser | 24 | 33 | 0           | 0          | 0          | 0          | 0          | 0          | 0          | 0          | 0         | 2           | 0          | 0          | 0         |  |
| p.Cys1324Tyr | 24 | 33 | 0           | 0          | 0          | 0          | 0          | 0          | 0          | 0          | 0         | 1           | 0          | 0          | 0         |  |
| p.Cys1350Gly | 24 | 34 | 0           | 0          | 0          | 0          | 0          | 0          | 0          | 0          | 0         | 0           | 0          | 0          | 2         |  |
| p.Arg1360Cys | 24 | 34 | 0           | 0          | 0          | 0          | 0          | 0          | 0          | 0          | 0         | 1           | 0          | 0          | 0         |  |
| p.Cys1372Trp | 24 | 34 | 0           | 0          | 0          | 0          | 0          | 0          | 0          | 0          | 0         | 1           | 0          | 0          | 0         |  |
| <b>Total</b> |    |    | <b>950</b>  | <b>497</b> | <b>263</b> | <b>242</b> | <b>180</b> | <b>171</b> | <b>114</b> | <b>112</b> | <b>45</b> | <b>1003</b> | <b>473</b> | <b>131</b> | <b>40</b> |  |
|              |    |    | <b>2574</b> |            |            |            |            |            |            |            |           | <b>1647</b> |            |            |           |  |

**Supplementary Table 8. Frequency of *NOTCH3*<sup>Cys</sup> variants in the CADASIL cohorts and population genotype-phenotype datasets.**

Abbreviations: GER = Germany; ITA = Italy; NL = the Netherlands; UKB = UK Biobank.

| Genetic information |      |      | CADASIL |     |     | Population |
|---------------------|------|------|---------|-----|-----|------------|
| p.mut               | exon | EGFR | NL      | GER | ITA | UKB        |
| p.Cys43Gly          | 2    | 1    | 0       | 3   | 0   | 0          |
| p.Arg54Cys          | 2    | 1    | 3       | 0   | 2   | 1          |
| p.Cys65Ser          | 2    | 1    | 0       | 3   | 2   | 0          |
| p.Cys76Trp          | 3    | 1    | 0       | 1   | 0   | 0          |
| p.Arg90Cys          | 3    | 2    | 0       | 10  | 3   | 1          |
| p.Cys93Phe          | 3    | 2    | 0       | 2   | 0   | 0          |
| p.Cys93Tyr          | 3    | 2    | 0       | 1   | 0   | 0          |
| p.Arg110Cys         | 3    | 2    | 5       | 3   | 2   | 2          |
| p.Cys117Arg         | 4    | 2    | 0       | 0   | 2   | 0          |
| p.Cys117Tyr         | 4    | 2    | 2       | 0   | 0   | 0          |
| p.Cys117Thr         | 4    | 2    | 0       | 1   | 0   | 0          |
| p.Arg133Cys         | 4    | 3    | 3       | 9   | 5   | 0          |
| p.Arg141Cys         | 4    | 3    | 16      | 1   | 4   | 5          |
| p.Cys144Phe         | 4    | 3    | 4       | 0   | 0   | 0          |
| p.Cys144Tyr         | 4    | 3    | 0       | 1   | 0   | 0          |
| p.Cys144Thr         | 4    | 3    | 0       | 1   | 0   | 0          |
| p.Gly149Cys         | 4    | 3    | 0       | 4   | 0   | 0          |
| p.Tyr150Cys         | 4    | 3    | 0       | 4   | 0   | 0          |
| p.Arg153Cys         | 4    | 3    | 11      | 2   | 0   | 1          |
| p.Cys155Ser         | 4    | 3    | 0       | 2   | 0   | 0          |
| p.Cys155Tyr         | 4    | 3    | 0       | 1   | 0   | 0          |
| p.Cys162Trp         | 4    | 4    | 3       | 0   | 0   | 0          |
| p.Gly165Cys         | 4    | 4    | 0       | 1   | 0   | 0          |
| p.Arg169Cys         | 4    | 4    | 3       | 11  | 3   | 2          |
| p.Cys174Arg         | 4    | 4    | 0       | 1   | 0   | 0          |
| p.Cys174Tyr         | 4    | 4    | 0       | 1   | 0   | 0          |
| p.Arg182Cys         | 4    | 4    | 13      | 34  | 6   | 7          |
| p.Cys183Arg         | 4    | 4    | 0       | 2   | 0   | 0          |
| p.Cys183Tyr         | 4    | 4    | 2       | 0   | 0   | 0          |
| p.Cys183Phe         | 4    | 4    | 0       | 1   | 0   | 0          |
| p.Cys185Arg         | 4    | 4    | 0       | 4   | 0   | 0          |
| p.Cys201Tyr         | 4    | 5    | 0       | 1   | 0   | 0          |
| p.Cys206Ser         | 4    | 5    | 0       | 1   | 0   | 0          |
| p.Arg207Cys         | 4    | 5    | 28      | 2   | 4   | 2          |
| p.Cys212Ser         | 4    | 5    | 1       | 0   | 0   | 0          |
| p.Cys212Tyr         | 4    | 5    | 0       | 1   | 0   | 0          |
| p.Cys222Tyr         | 4    | 5    | 1       | 1   | 0   | 0          |
| p.Cys222Thr         | 4    | 5    | 0       | 2   | 0   | 0          |
| p.Cys224Tyr         | 4    | 5    | 1       | 0   | 0   | 0          |
| p.Cys233Tyr         | 5    | 5    | 1       | 0   | 0   | 0          |
| p.Cys240Ser         | 5    | 6    | 0       | 0   | 2   | 0          |
| p.Cys251Arg         | 5    | 6    | 0       | 0   | 2   | 0          |
| p.Cys251Tyr         | 5    | 6    | 0       | 0   | 1   | 0          |
| p.Tyr258Cys         | 5    | 6    | 0       | 0   | 0   | 1          |
| p.Cys260Tyr         | 5    | 6    | 0       | 1   | 0   | 0          |
| p.Cys311Ser         | 6    | 7    | 0       | 0   | 0   | 2          |
| p.Cys318Phe         | 6    | 8    | 2       | 0   | 0   | 2          |
| p.Arg332Cys         | 6    | 8    | 0       | 1   | 4   | 1          |
| p.Tyr337Cys         | 6    | 8    | 0       | 3   | 0   | 1          |
| p.Cys360Tyr         | 7    | 9    | 0       | 0   | 0   | 1          |
| p.Cys377Tyr         | 7    | 9    | 1       | 0   | 0   | 0          |
| p.Ser396Cys         | 7    | 10   | 2       | 0   | 3   | 0          |
| p.Cys408Arg         | 8    | 10   | 0       | 0   | 0   | 1          |
| p.Cys419Ser         | 8    | 10   | 0       | 0   | 0   | 1          |

|             |    |      |    |   |    |    |
|-------------|----|------|----|---|----|----|
| p.Arg421Cys | 8  | 10   | 1  | 0 | 0  | 2  |
| p.Arg427Cys | 8  | 10   | 1  | 1 | 1  | 0  |
| p.Cys428Tyr | 8  | 10   | 0  | 2 | 0  | 0  |
| p.Cys435Thr | 8  | 11   | 0  | 1 | 0  | 0  |
| p.Cys440Arg | 8  | 11   | 0  | 1 | 0  | 0  |
| p.Cys446Ser | 8  | 11   | 0  | 2 | 0  | 0  |
| p.Cys446Tyr | 8  | 11   | 0  | 0 | 1  | 0  |
| p.Arg449Cys | 8  | 11   | 2  | 0 | 0  | 0  |
| p.Cys455Tyr | 8  | 11   | 0  | 0 | 0  | 1  |
| p.Tyr465Cys | 9  | 11   | 0  | 0 | 0  | 1  |
| p.Ser476Cys | 9  | 12   | 0  | 0 | 0  | 3  |
| p.Gly481Cys | 9  | 12   | 0  | 0 | 0  | 2  |
| p.Cys484Arg | 9  | 12   | 0  | 0 | 0  | 1  |
| p.Cys495Gly | 9  | 12   | 0  | 0 | 0  | 1  |
| p.Cys504Arg | 10 | 12   | 0  | 0 | 0  | 1  |
| p.Cys511Phe | 10 | 13   | 0  | 0 | 1  | 1  |
| p.Cys516Phe | 10 | 13   | 0  | 0 | 0  | 7  |
| p.Cys516Tyr | 10 | 13   | 0  | 0 | 0  | 1  |
| p.Cys522Ser | 10 | 13   | 0  | 0 | 0  | 1  |
| p.Gly528Cys | 10 | 13   | 0  | 0 | 2  | 0  |
| p.Cys531Gly | 10 | 13   | 2  | 0 | 0  | 0  |
| p.Arg532Cys | 10 | 13   | 0  | 0 | 0  | 4  |
| p.Cys533Ser | 10 | 13   | 0  | 1 | 0  | 0  |
| p.Arg544Cys | 11 | 13.5 | 2  | 1 | 0  | 15 |
| p.Cys549Tyr | 11 | 14   | 0  | 3 | 0  | 0  |
| p.Cys551Arg | 11 | 14   | 0  | 1 | 0  | 0  |
| p.Cys554Phe | 11 | 14   | 0  | 0 | 0  | 1  |
| p.Arg558Cys | 11 | 14   | 1  | 3 | 0  | 4  |
| p.Cys568Tyr | 11 | 14   | 5  | 0 | 0  | 0  |
| p.Tyr574Cys | 11 | 14   | 0  | 0 | 4  | 0  |
| p.Arg578Cys | 11 | 14   | 45 | 0 | 10 | 13 |
| p.Cys579Tyr | 11 | 14   | 0  | 0 | 0  | 2  |
| p.Arg587Cys | 11 | 15   | 2  | 0 | 0  | 7  |
| p.Arg592Cys | 11 | 15   | 0  | 0 | 0  | 1  |
| p.Gly595Cys | 11 | 15   | 2  | 0 | 0  | 0  |
| p.Arg607Cys | 11 | 15   | 3  | 1 | 4  | 7  |
| p.Cys608Trp | 11 | 15   | 0  | 0 | 0  | 1  |
| p.Cys629Arg | 12 | 16   | 0  | 0 | 0  | 1  |
| p.Arg640Cys | 12 | 16   | 0  | 0 | 0  | 20 |
| p.Cys645Tyr | 12 | 16   | 0  | 0 | 0  | 1  |
| p.Cys654Tyr | 13 | 16   | 0  | 0 | 0  | 1  |
| p.Gly667Cys | 13 | 17   | 9  | 0 | 0  | 2  |
| p.Ser671Cys | 13 | 17   | 0  | 0 | 0  | 4  |
| p.Cys672Tyr | 13 | 17   | 0  | 0 | 0  | 1  |
| p.Arg680Cys | 13 | 17   | 0  | 0 | 0  | 3  |
| p.Tyr710Cys | 13 | 18   | 0  | 0 | 0  | 1  |
| p.Arg717Cys | 14 | 18   | 0  | 0 | 0  | 29 |
| p.Cys720Tyr | 14 | 18   | 0  | 0 | 0  | 1  |
| p.Arg728Cys | 14 | 18   | 3  | 0 | 0  | 15 |
| p.Ser740Cys | 14 | 19   | 0  | 0 | 0  | 1  |
| p.Cys758Tyr | 14 | 19   | 0  | 0 | 0  | 1  |
| p.Arg767Cys | 15 | 19   | 0  | 0 | 0  | 12 |
| p.Cys769Tyr | 15 | 19   | 0  | 0 | 0  | 1  |
| p.Arg785Cys | 15 | 20   | 0  | 0 | 0  | 12 |
| p.Cys796Phe | 15 | 20   | 0  | 0 | 0  | 1  |
| p.Cys796Ser | 15 | 20   | 0  | 0 | 0  | 1  |
| p.Cys796Tyr | 15 | 20   | 0  | 0 | 0  | 1  |
| p.Cys798Tyr | 15 | 20   | 0  | 0 | 0  | 2  |
| p.Trp802Cys | 15 | 20   | 0  | 0 | 0  | 6  |
| p.Cys858Trp | 17 | 22   | 0  | 0 | 0  | 1  |
| p.Gly861Cys | 17 | 22   | 0  | 0 | 0  | 1  |
| p.Cys873Arg | 17 | 22   | 0  | 0 | 0  | 1  |
| p.Cys910Tyr | 17 | 23   | 0  | 0 | 0  | 5  |
| p.Cys910Arg | 17 | 23   | 0  | 0 | 0  | 2  |
| p.Cys912Ser | 17 | 23   | 0  | 0 | 0  | 2  |
| p.Tyr916Cys | 17 | 23   | 0  | 0 | 1  | 10 |

|              |    |    |     |     |    |      |
|--------------|----|----|-----|-----|----|------|
| p.Cys939Ser  | 18 | 24 | 0   | 0   | 0  | 2    |
| p.Cys948Phe  | 18 | 24 | 0   | 0   | 0  | 1    |
| p.Arg951Cys  | 18 | 24 | 0   | 0   | 0  | 1    |
| p.Cys971Tyr  | 18 | 25 | 0   | 0   | 0  | 1    |
| p.Arg985Cys  | 18 | 25 | 0   | 0   | 5  | 0    |
| p.Cys986Arg  | 18 | 25 | 0   | 0   | 0  | 1    |
| p.Cys986Gly  | 18 | 25 | 0   | 0   | 0  | 1    |
| p.Cys988Arg  | 18 | 25 | 0   | 1   | 0  | 0    |
| p.Gly994Cys  | 18 | 25 | 0   | 0   | 0  | 1    |
| p.Cys997Gly  | 18 | 25 | 0   | 0   | 8  | 0    |
| p.Cys997Ser  | 18 | 25 | 0   | 2   | 0  | 0    |
| p.Cys1004Tyr | 19 | 26 | 0   | 0   | 0  | 1    |
| p.Arg1006Cys | 19 | 26 | 0   | 0   | 5  | 1    |
| p.Cys1015Arg | 19 | 26 | 12  | 0   | 0  | 1    |
| p.Tyr1021Cys | 19 | 26 | 0   | 0   | 3  | 0    |
| p.Arg1031Cys | 19 | 26 | 2   | 0   | 0  | 3    |
| p.Cys1055Tyr | 20 | 27 | 0   | 0   | 0  | 1    |
| p.Cys1061Tyr | 20 | 27 | 0   | 0   | 0  | 3    |
| p.Gly1165Cys | 20 | 27 | 0   | 0   | 0  | 3    |
| p.Arg1072Cys | 20 | 27 | 0   | 2   | 0  | 0    |
| p.Arg1076Cys | 20 | 27 | 4   | 0   | 1  | 1    |
| p.Arg1100Cys | 20 | 28 | 0   | 0   | 0  | 3    |
| p.Cys1108Arg | 20 | 28 | 0   | 0   | 0  | 2    |
| p.Cys1110Arg | 21 | 28 | 0   | 0   | 0  | 4    |
| p.Cys1119Tyr | 21 | 28 | 0   | 0   | 0  | 6    |
| p.Cys1137Arg | 21 | 29 | 0   | 0   | 0  | 1    |
| p.Arg1143Cys | 21 | 29 | 0   | 0   | 0  | 133  |
| p.Tyr1144Cys | 21 | 29 | 0   | 0   | 0  | 2    |
| p.Cys1148Phe | 21 | 29 | 0   | 0   | 0  | 1    |
| p.Cys1157Arg | 22 | 29 | 0   | 0   | 0  | 1    |
| p.Cys1176Tyr | 22 | 30 | 0   | 0   | 0  | 1    |
| p.Cys1182Trp | 22 | 30 | 0   | 0   | 0  | 1    |
| p.Arg1190Cys | 22 | 30 | 0   | 0   | 0  | 21   |
| p.Cys1193Tyr | 22 | 30 | 0   | 0   | 0  | 1    |
| p.Arg1201Cys | 22 | 30 | 0   | 0   | 0  | 52   |
| p.Arg1210Cys | 22 | 31 | 0   | 0   | 0  | 3    |
| p.Cys1222Gly | 22 | 31 | 0   | 0   | 0  | 212  |
| p.Cys1222Ser | 22 | 31 | 0   | 0   | 3  | 0    |
| p.Cys1222Arg | 22 | 31 | 0   | 0   | 0  | 1    |
| p.Arg1231Cys | 22 | 31 | 2   | 0   | 1  | 255  |
| p.Arg1242Cys | 23 | 31 | 0   | 0   | 0  | 9    |
| p.Cys1250Arg | 23 | 32 | 0   | 0   | 0  | 1    |
| p.Cys1261Trp | 23 | 32 | 0   | 0   | 0  | 1    |
| p.Arg1262Cys | 23 | 32 | 0   | 0   | 0  | 1    |
| p.Cys1275Ser | 23 | 32 | 0   | 0   | 0  | 1    |
| p.Gly1283Cys | 24 | 32 | 0   | 0   | 0  | 1    |
| p.Arg1291Cys | 24 | 33 | 0   | 0   | 0  | 2    |
| p.Cys1293Phe | 24 | 33 | 0   | 0   | 0  | 1    |
| p.Cys1313Ser | 24 | 33 | 0   | 0   | 0  | 1    |
| p.Cys1315Phe | 24 | 33 | 0   | 0   | 0  | 10   |
| p.Cys1315Trp | 24 | 33 | 0   | 0   | 0  | 1    |
| p.Cys1324Ser | 24 | 33 | 0   | 0   | 0  | 2    |
| p.Cys1324Tyr | 24 | 33 | 0   | 0   | 0  | 1    |
| p.Arg1360Cys | 24 | 34 | 0   | 0   | 0  | 1    |
| p.Cys1372Trp | 24 | 34 | 0   | 0   | 0  | 1    |
| Total        |    |    | 200 | 139 | 95 | 1003 |
|              |    |    | 434 |     |    | 1003 |
